# Supplementary material for: Sustainable Transition Metal Free Synthesis of Substituted γ-Lactones
Source: Research Square preprint supplement (doi:10.21203/rs.3.rs-7365888/v1), 2025-09-24

**Supporting Information**

**Transition Metal-Free Synthesis of Substituted γ-Lactones Using Iodine/DMSO System**

Smita Waghmare,a Harsh K. Gaikwad,b Vishal Deorec

1*Dept. of Chemistry, Modern Education Society’s Nowrosjee Wadia College, Pune, Maharashtra, India.

2 Dept. of Chemistry, Modern College of Arts, Science and Commerce Shivajinagar, Pune, Maharashtra, India

c Cummins college of Engineering, Pune, Maharashtra, India

Corresponding Author: Dr. Smita R. Waghmare

E-mail: smitaw23@gmail.com

Table of Contents

1. General remarks
2. General procedure
3. Spectra

# 1. GENERAL REMARKS

A commercially available reagents were used of analytical grade and employed without further purification. The products were purified using column chromatography wherever needed. Synthesized compounds were identified by spectroscopic data, melting points and by comparison with available standards. FTIR spectra were obtained with a Shimadzu 8000 spectrophotometer. H1 and NMR spectra were recorded on varian spectrometer. Chemical shifts (δ) are reported in ppm and with 60 F254 plates and spots were rendered visible by exposing to UV light and Iodine. Melting points were determined with an electro thermal model 9100 apparatus and are uncorrected.

# Experimental Details:

1. **Synthesis of lactone from phenyl acetic acid**
   1. Esterification of phenyl acetic acid to methyl phenyl acetate:

0.5 gm of phenyl acetic acid was taken in round bottom flask and was dissolved in Methanol.

Methanol was used as solvent and 1 ml of concentrated sulphuric acid was added as catalyst. Reaction mixture was kept on reflux for 5 hrs. Methyl phenyl acetate was obtained in 85% yield. During extraction, reaction mixture was treated with sodium bicarbonate solution to remove remaining phenyl acetic acid and sulphuric acid.

# Synthesis of (alpha propene) methyl phenyl acetate:

0.5 gm of methyl phenyl acetate was taken in round bottom flask. 2 pellets of KOH were added into the flask. This mixture was dissolved in solvent DMSO. Reaction mixture was kept on magnetic stirrer for 20-30 mins and then allyl bromide was done by ether and yield of product obtained in 65%.

# Spectral Characterisation:

NMR data:- 7.4 δ m 5H ; 5.8 δ dd 1H J=15 Hz, 6Hz ; 5.9 δ dd 1H J=15 Hz, 6Hz; 5.2 δ m 1H; 3.6

δ s 3H; 2.5 δ dd 1H J=6Hz, 7Hz; 4.5 δ dd 1H J=6Hz.

# Synthesis of lactone from (alpha 2 propene) methyl phenyl acetate by using different solvents:

Four different solvents were used 0.2 gm of (alpha 2 propene) methyl phenyl acetate was taken in round bottom flask and dissolved in these solvents. Conditions for different solvent were different and they were as follows.

In that round bottom flask 0.2 gm of iodine was added as 1:1 proportion. Finally excess of iodine was removed by saturated solution of sodium thiosulfate. Extraction was done by ether.

**Spectral Characterisation:**

**IR data:**

1. **DMSO as solvent**

At room temperature: 3030, 2950, 1737.5, 1641.3, 1600.8, 1548.7, 704 cm-1

At 750C: 3028, 2925, 1776.5, 1735, 1645.2, 162.7, 704.0 cm-1 Here 1776.5 cm-1 shows that

lactone is present.

# MeOH as solvent

3030, 2950, 1778.2, 1735, 1641, 1602, 704 cm-1 Here 1778.2 cm-1 shows that lactone is present. Here 1735 cm-1 shows that ester is present.

# Pyridine as solvent

3030, 295., 1716.5, 1602, 702.9 cm-1 Here 1737.7 cm-1 shows that ester is present.

# 3) DCM as solvent

3030, 2950, 1716.5, 1602, 702.9 cm-1 Here 1716.5 cm-1 shows that acid is present.

# Synthesis of lactone from aliphatic ester ethyl hexanoate via ( alpha 2- propene) methyl phenyl acetate.

1.44 gm of NaH was taken in round bottom flask and washed with per ether to remove the petroleum oil from it and then DMF was added as solvent followed by 2 ml of ethyl hexanoate. This reaction mixture was kept on magnetic stirrer for 20 min and then 1.5 ml of allyl chloride was added instantly. All dry conditions were maintained. The reaction were kept at room temperature for 5 hrs. Here NaH, ester and allyl chloride was taken in proportion of 5:1:1. Yield obtained was 71%. But due to short time further reaction couldn’t be carried out. Extraction was done using ether. Before that cold water was added drop wise to neutralize NaH.

# Spectral Characterisation:

NMR data: 5.8 δ m 2H, 5.2 δ m 1H, 4.2 δ q 2H J= 3Hz, 2.4 δ m 1H J=5 Hz, 2.3 δ m 2H J=5. 1.5 δ

sextet 2H J=7, 1.7 δ quintet 2H, 1.2 δ t 3H, 0.96 δ t 3H, 2.6 δ m 2H.

1. Synthesis of cinnamyl Bromide from cinnamyl aldehyde via cinnamyl alcohols

# Reduction of cinnamyl aldehyde to alcohol:

1 gm of cinnamyl aldehyde was taken in round bottom flask and it was dissolved in MeOH and 10% NaOH solution was added in 1:1 eq of NaBH4. This reaction mixture was kept in ice bath till 00 C temp was attained and then NaBH4 was added portionwise in 0.5 hrs. After 5 hrsw extreaction was done with ether. Yield obtained was 65%.

Spectral Characterisation

NMR data: 7.3δ m 5H, 6.6 δ d 1H, 6.4 δ dt 1H, 4.3 δ d 2H, 2.3 δ s 1H.

# Bromination of cinnamyl alcohol:-

0.5 gm of connamyl alcohol was dissolved in CCl4 solution and kept reaction in ice bath upto 00C temp. 0.2 ml of bromine was dissolved in CCl4 solution and added dropwise into the former

solution. After addition, reaction was kept at RT for 48 hrs. The reaction mixture was extracted in ether. Five spots were obtained on TLC, then components were isolated by coloum chromatography. Cinnamyl bromide appeared as yellowish coloured solid, its m.p. is 350C. Yield obtained was 20%

# Allylation of methylphenyl acetate by cinnamyl bromide:-

0.1 gm of methyl phenyl acetate was taken in round bottom flask and it was dissolved in DMSO 1:1 KOH pellets were added to it. The mixture was kept on magnetic stirrer for 20 mins and then cinnamyl bromide was added, which was dissolved in DMSO. The reaction mixture was kept at room temperature for 3.5 hrs. After 3.5 hrs compound was extracted from mixture using ether. Yield of product was found to be very low (10%).


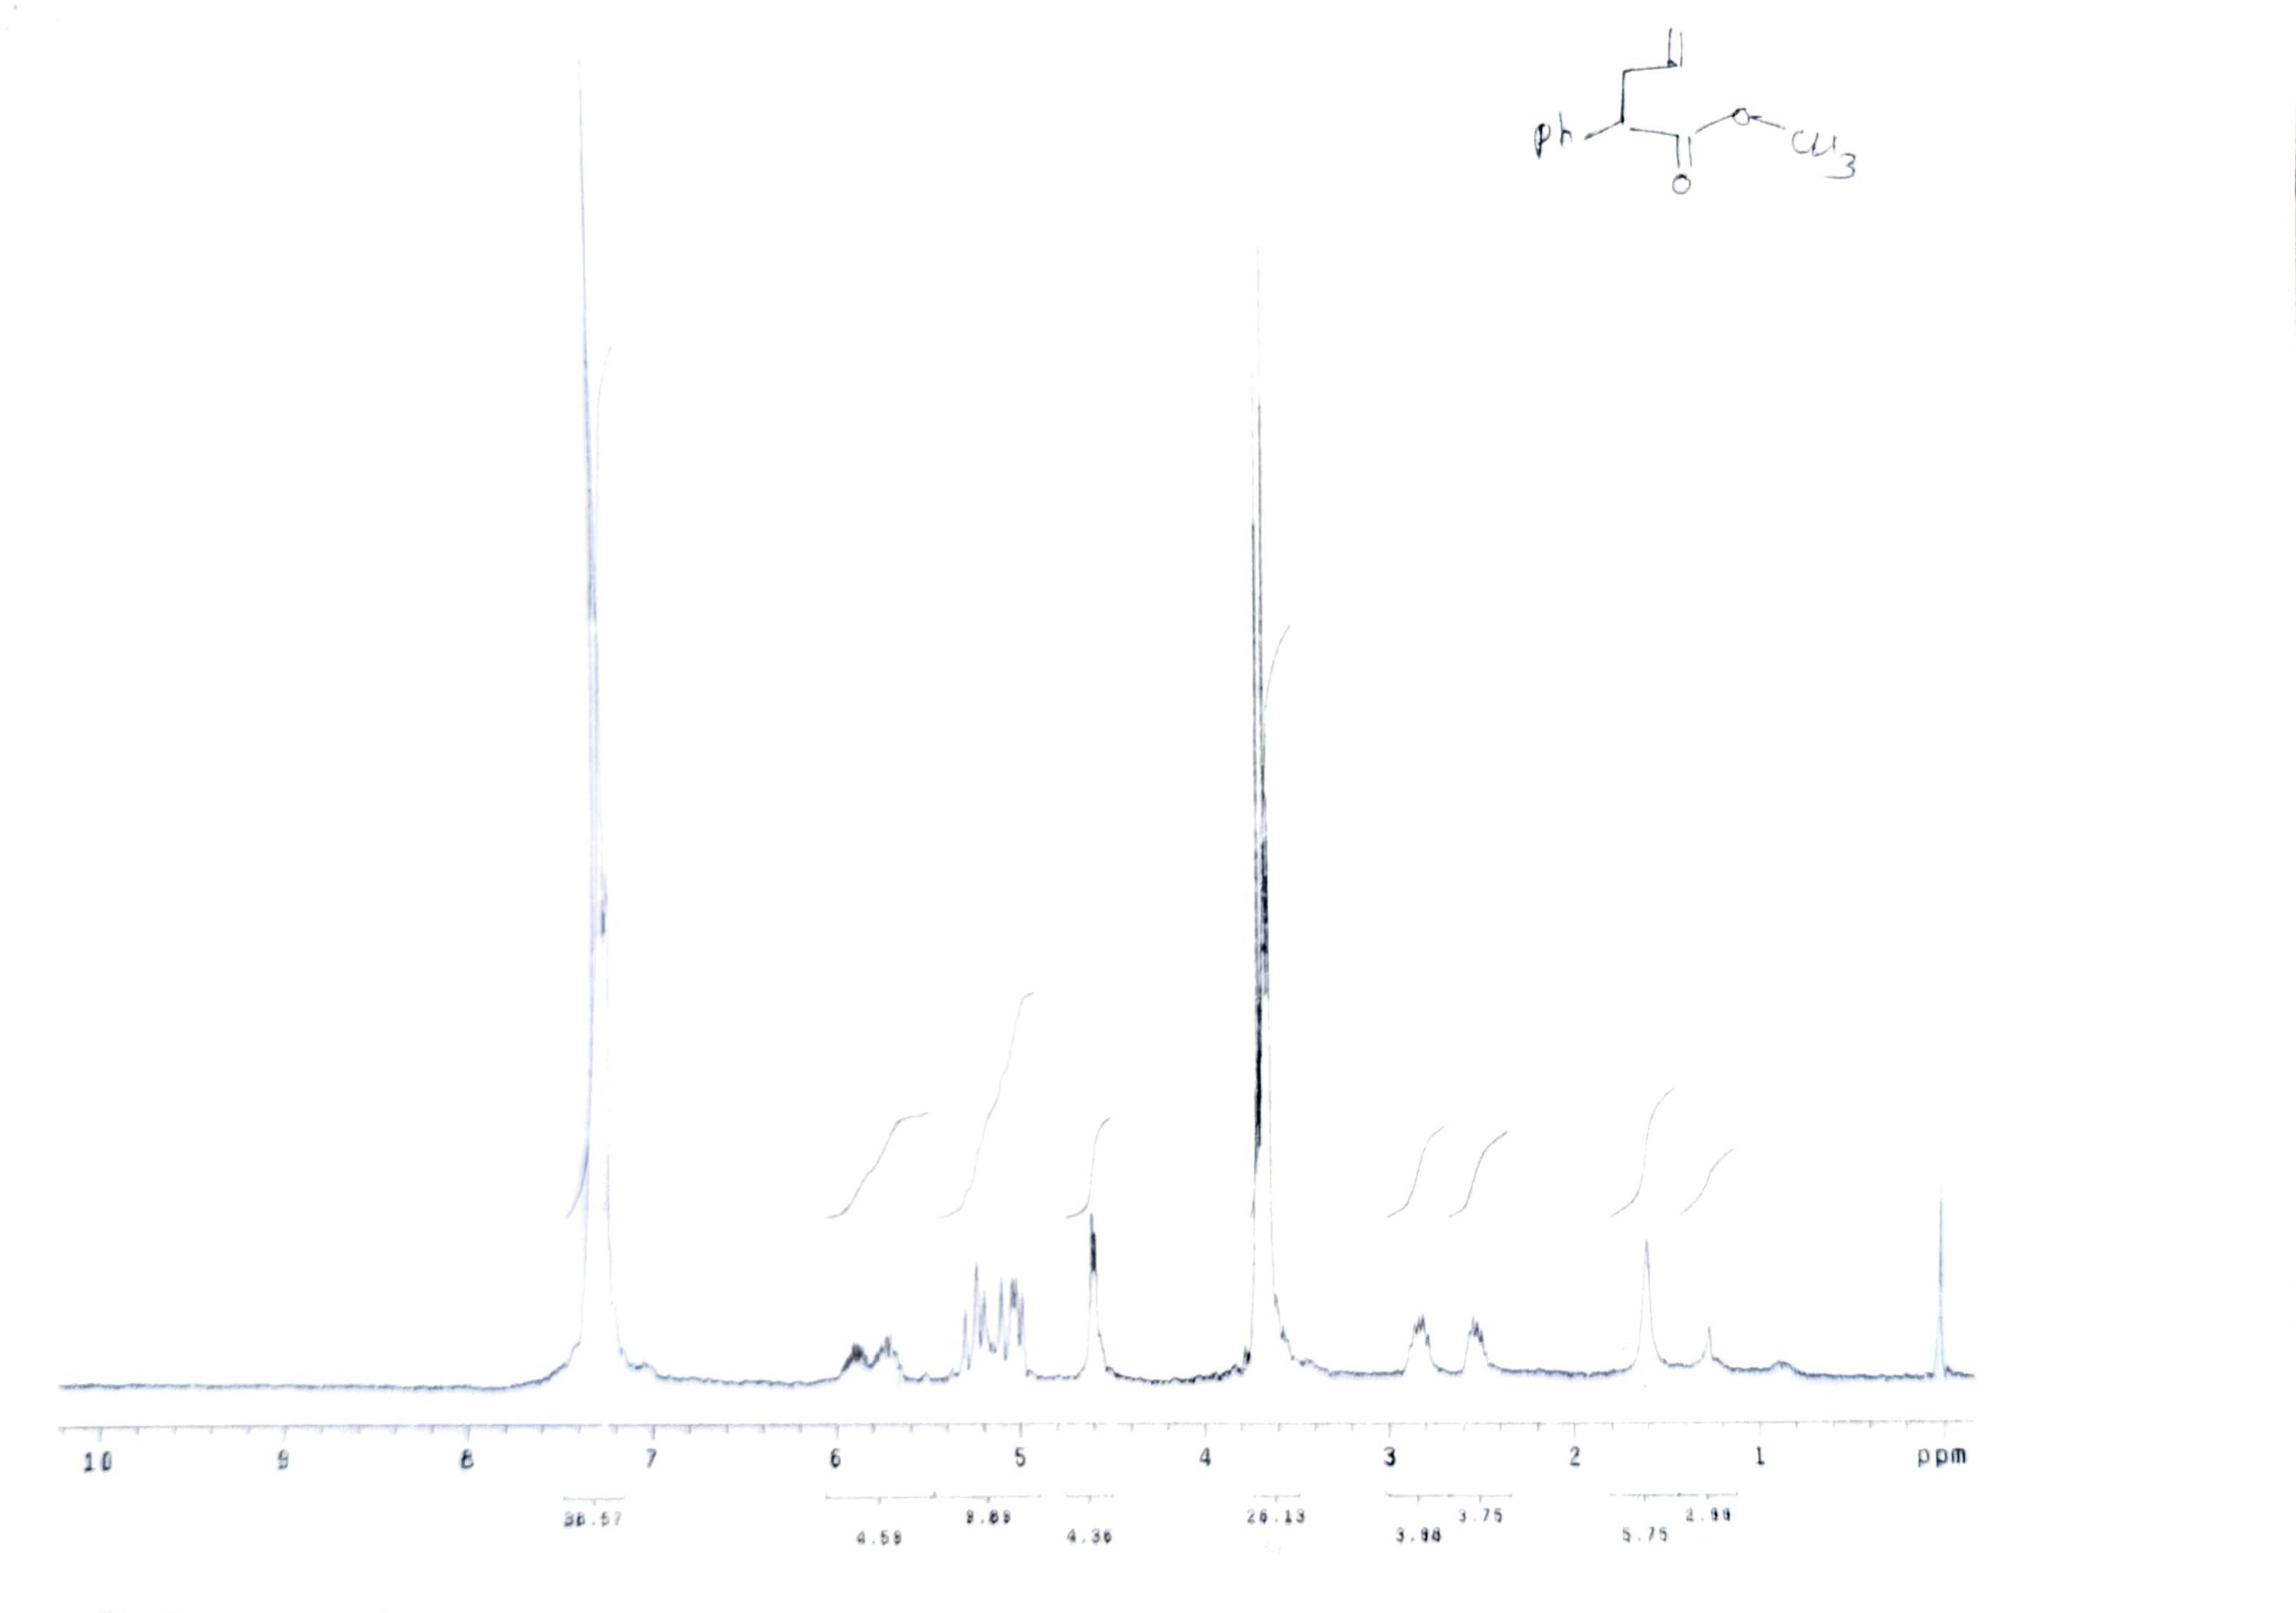


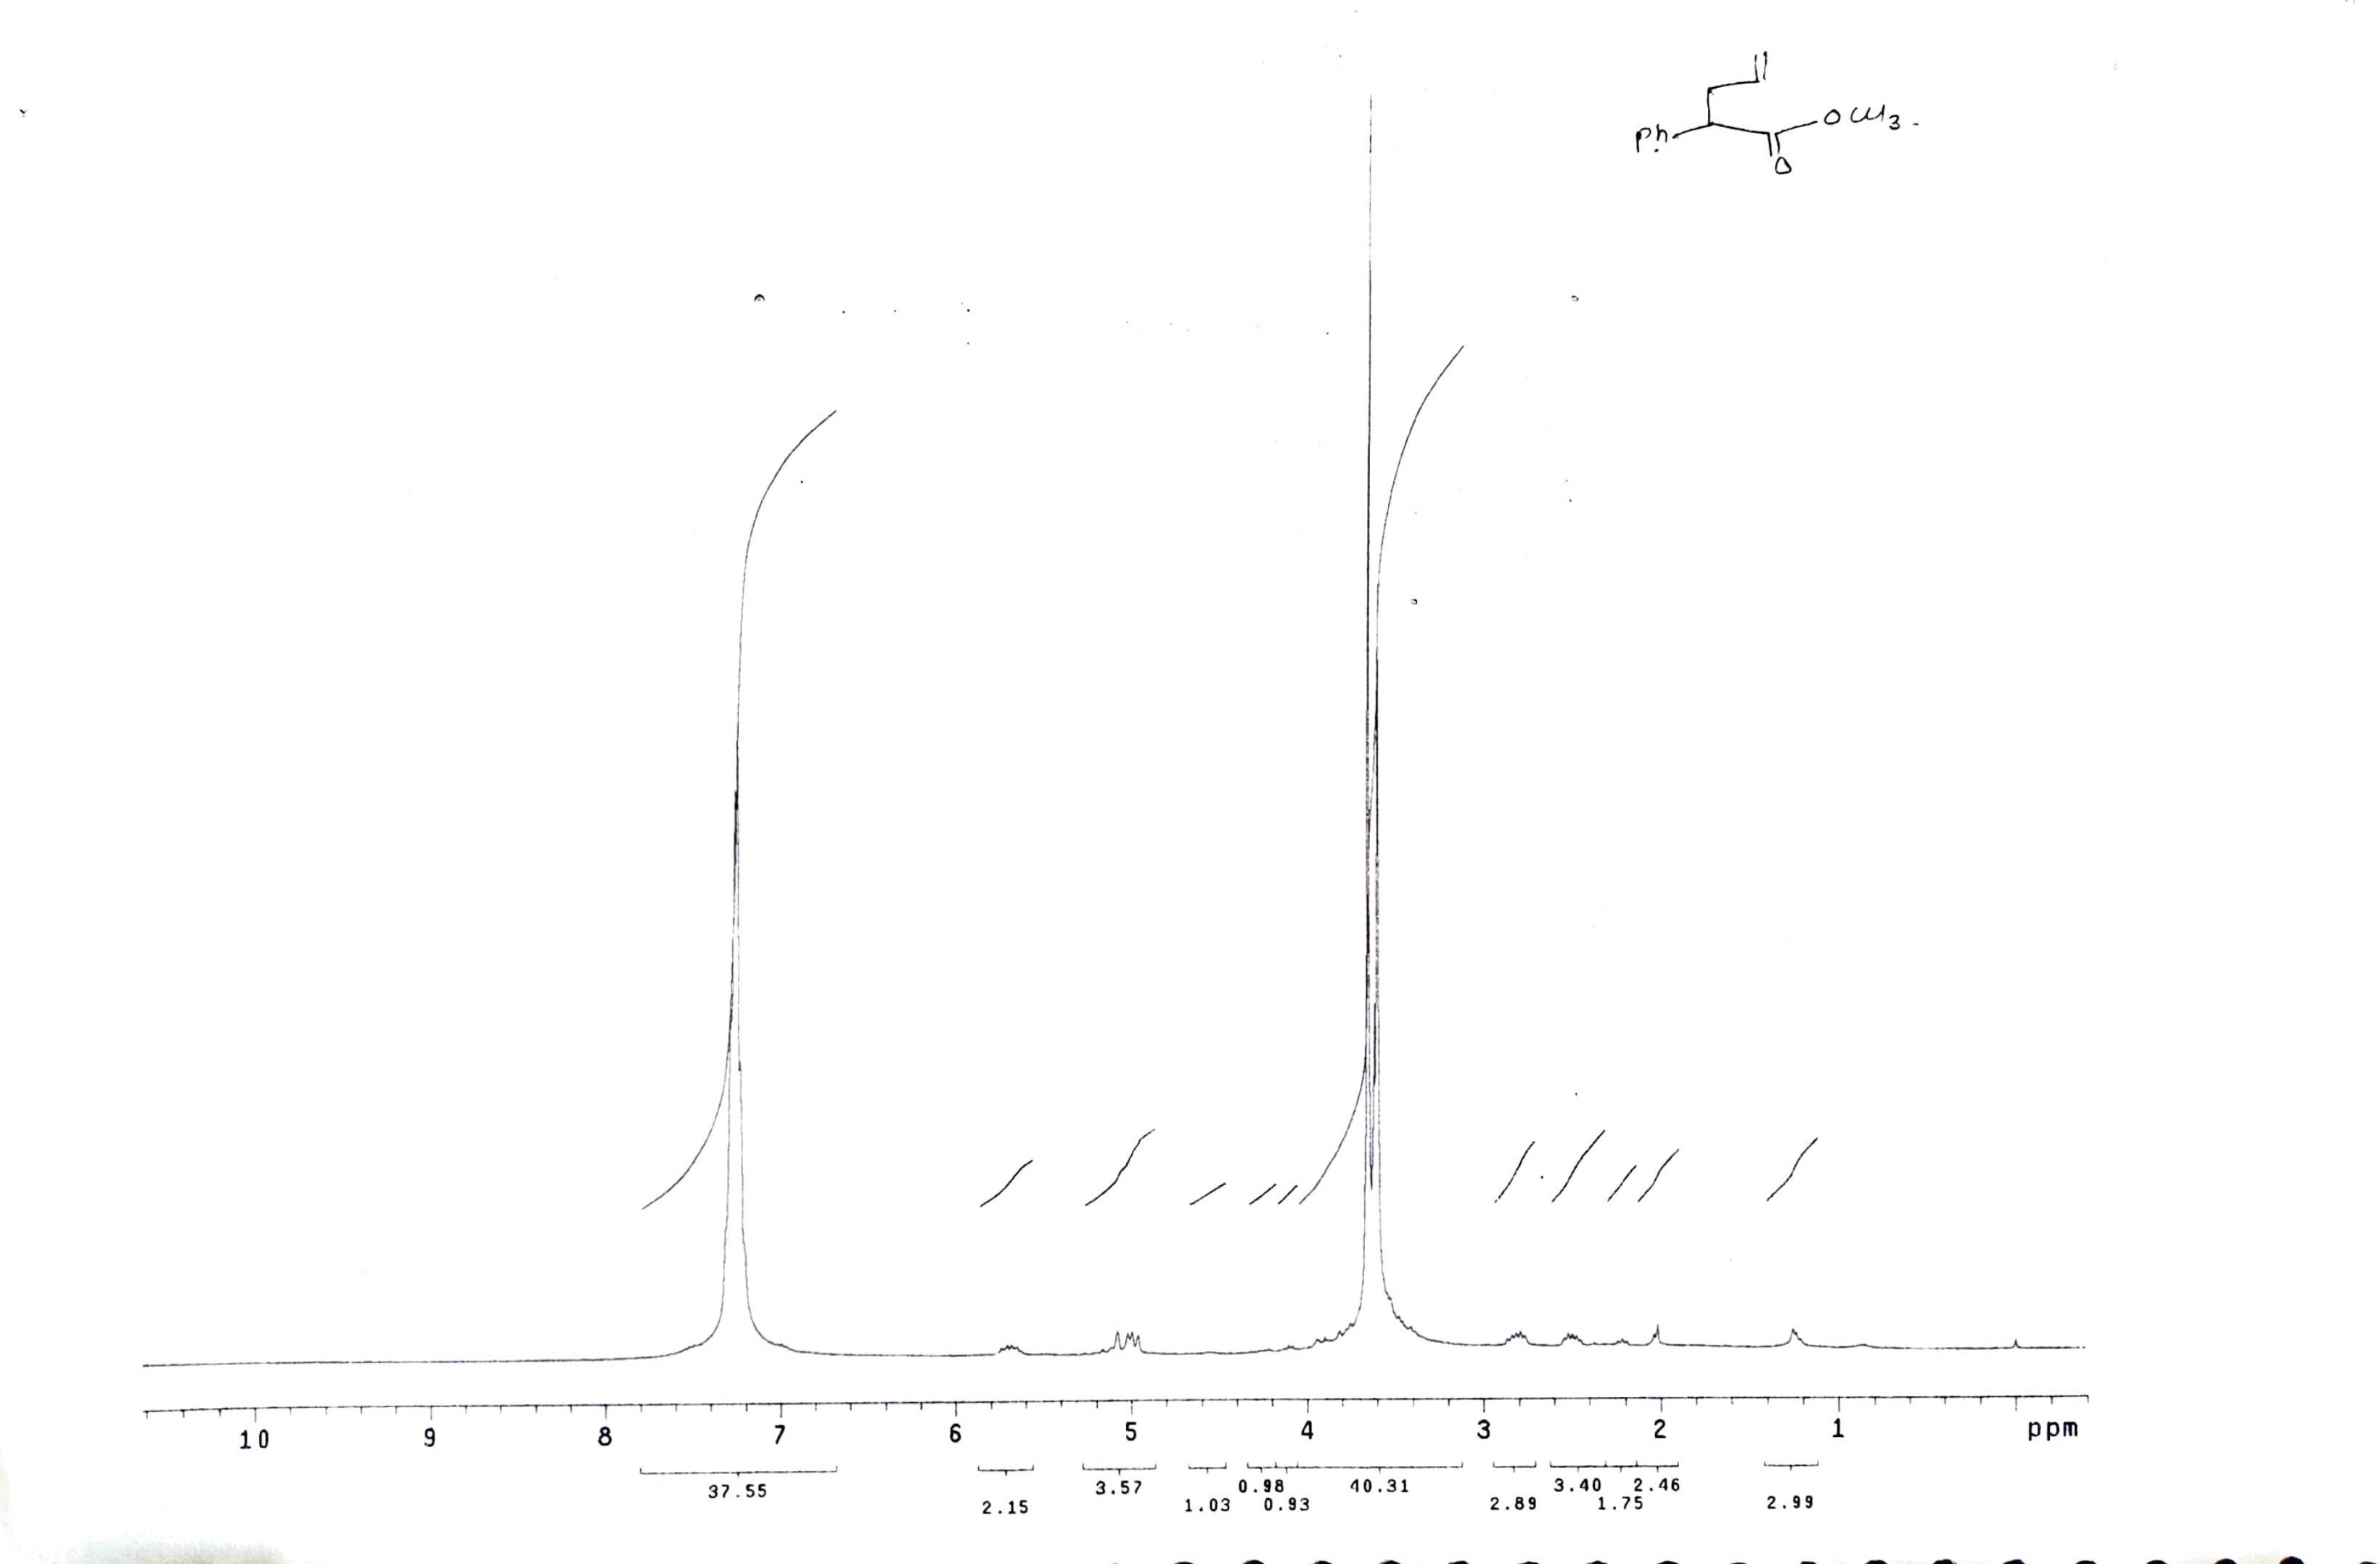


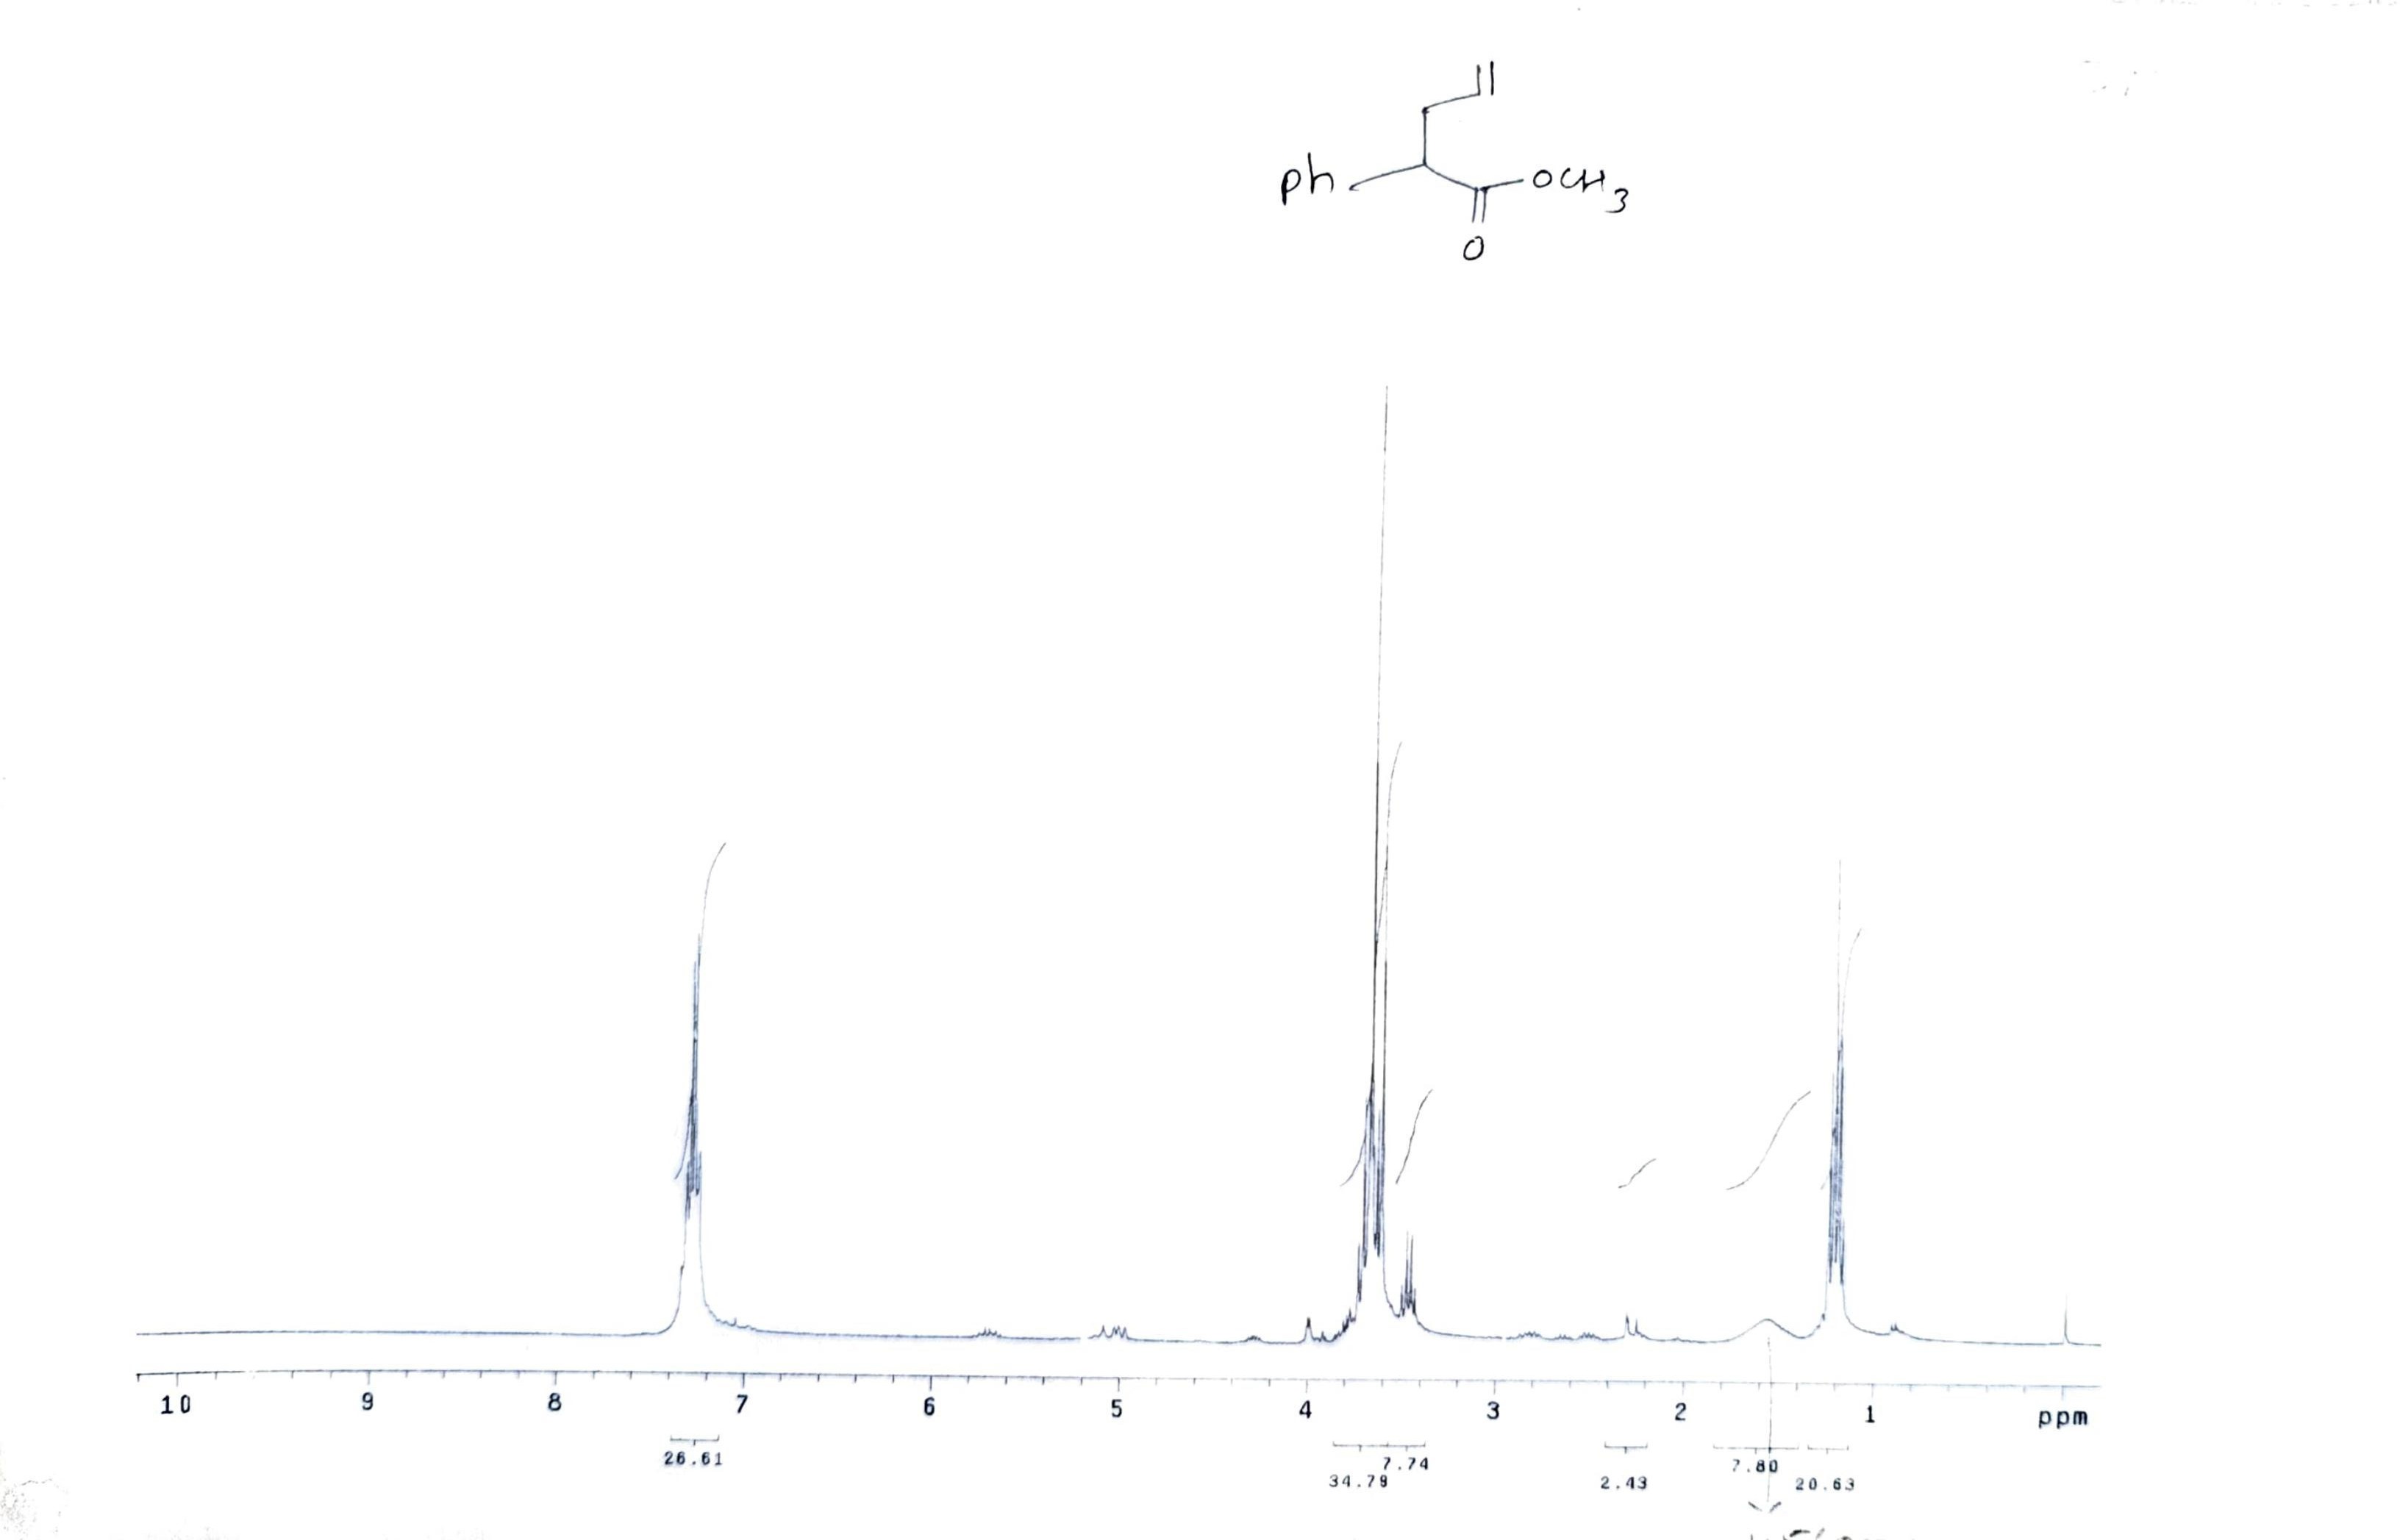


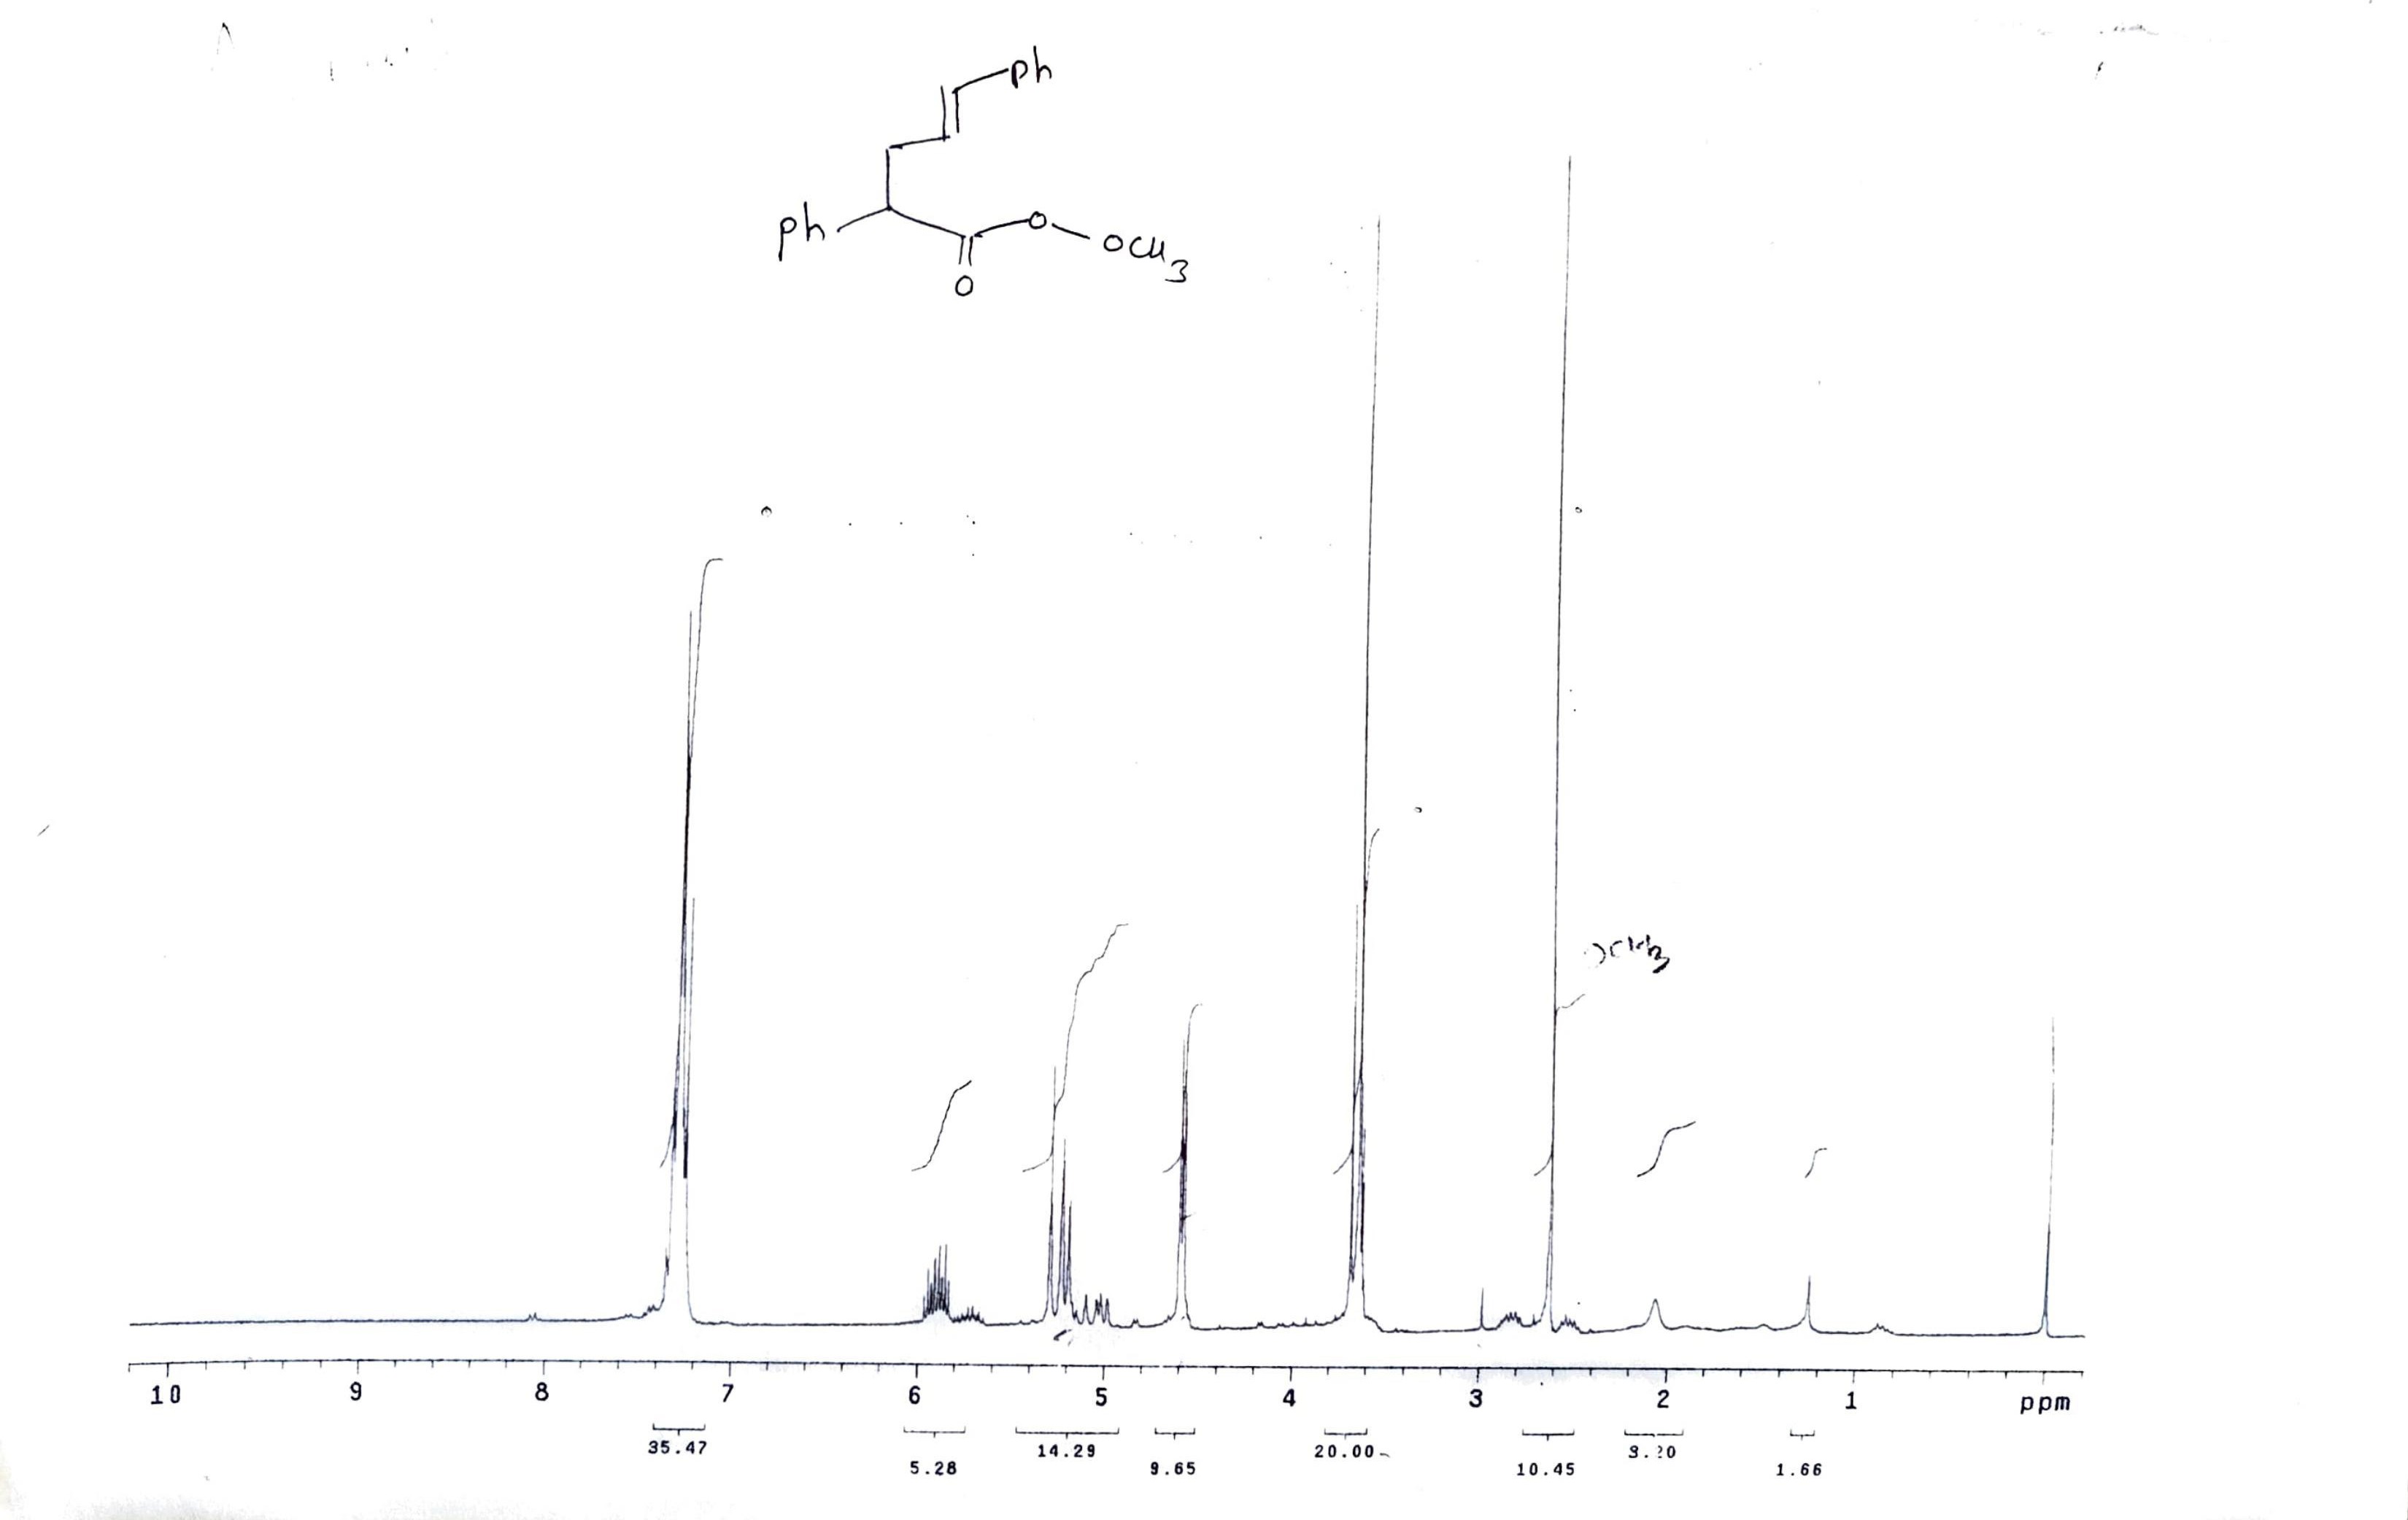


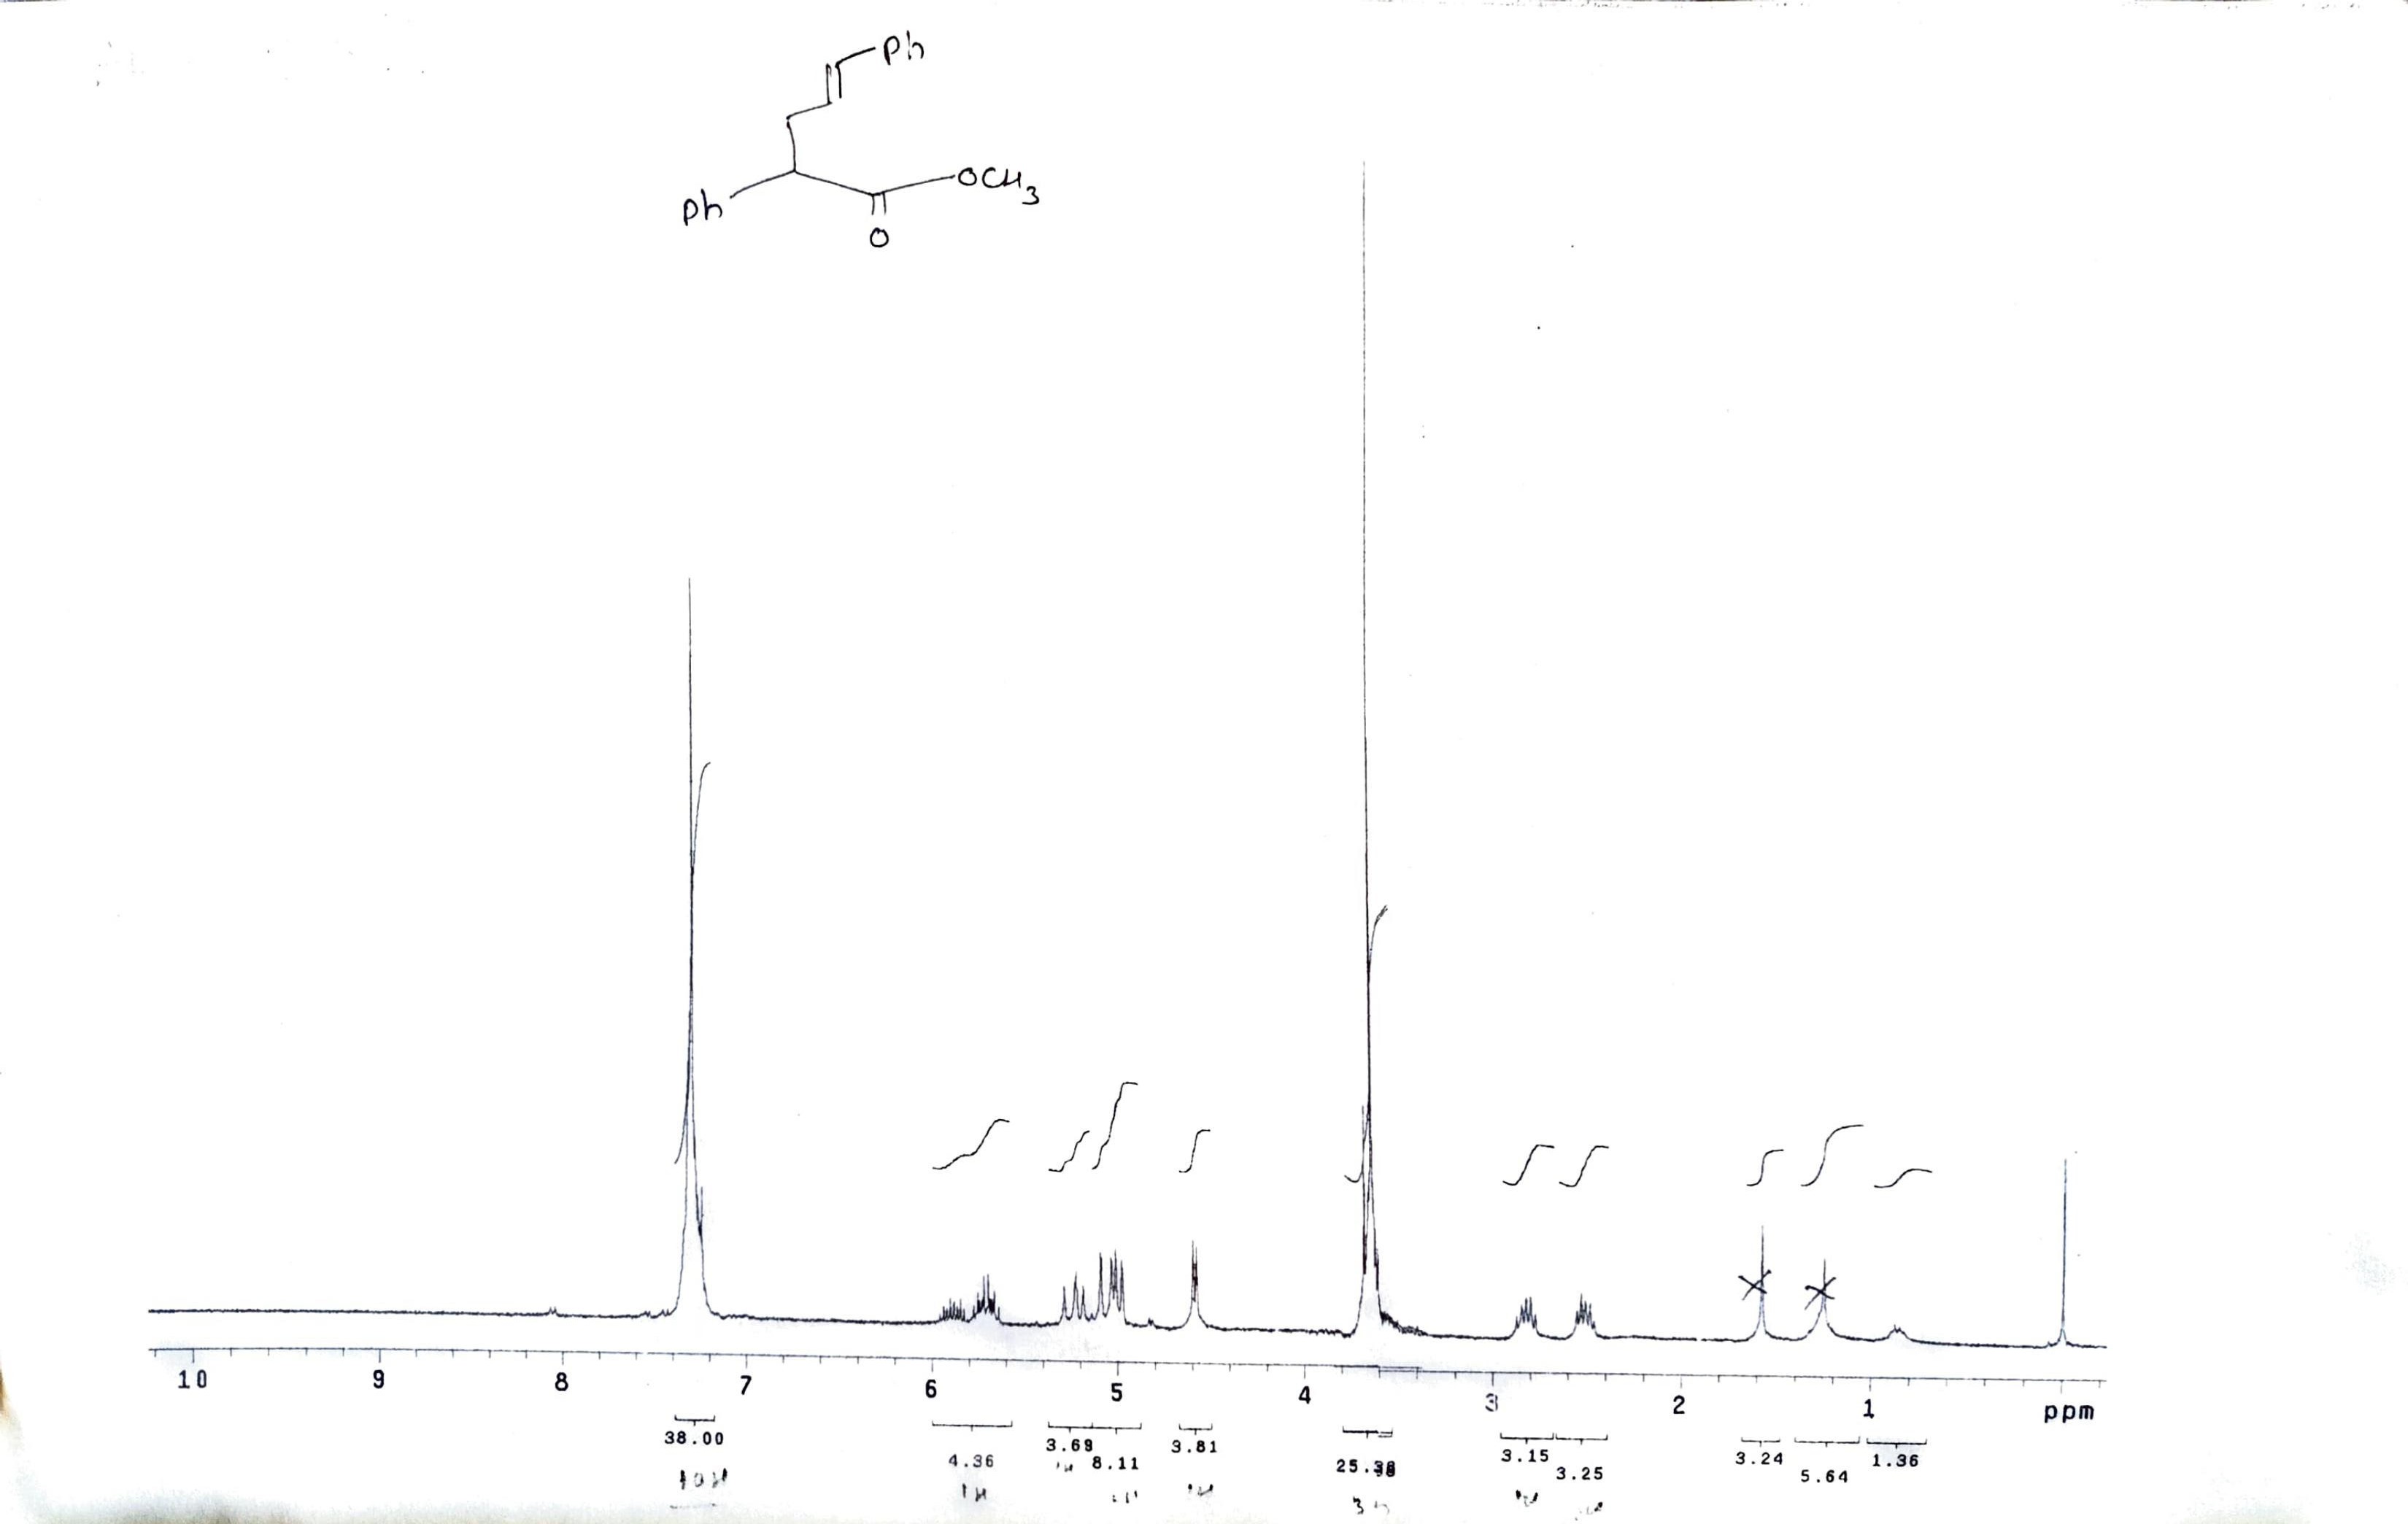


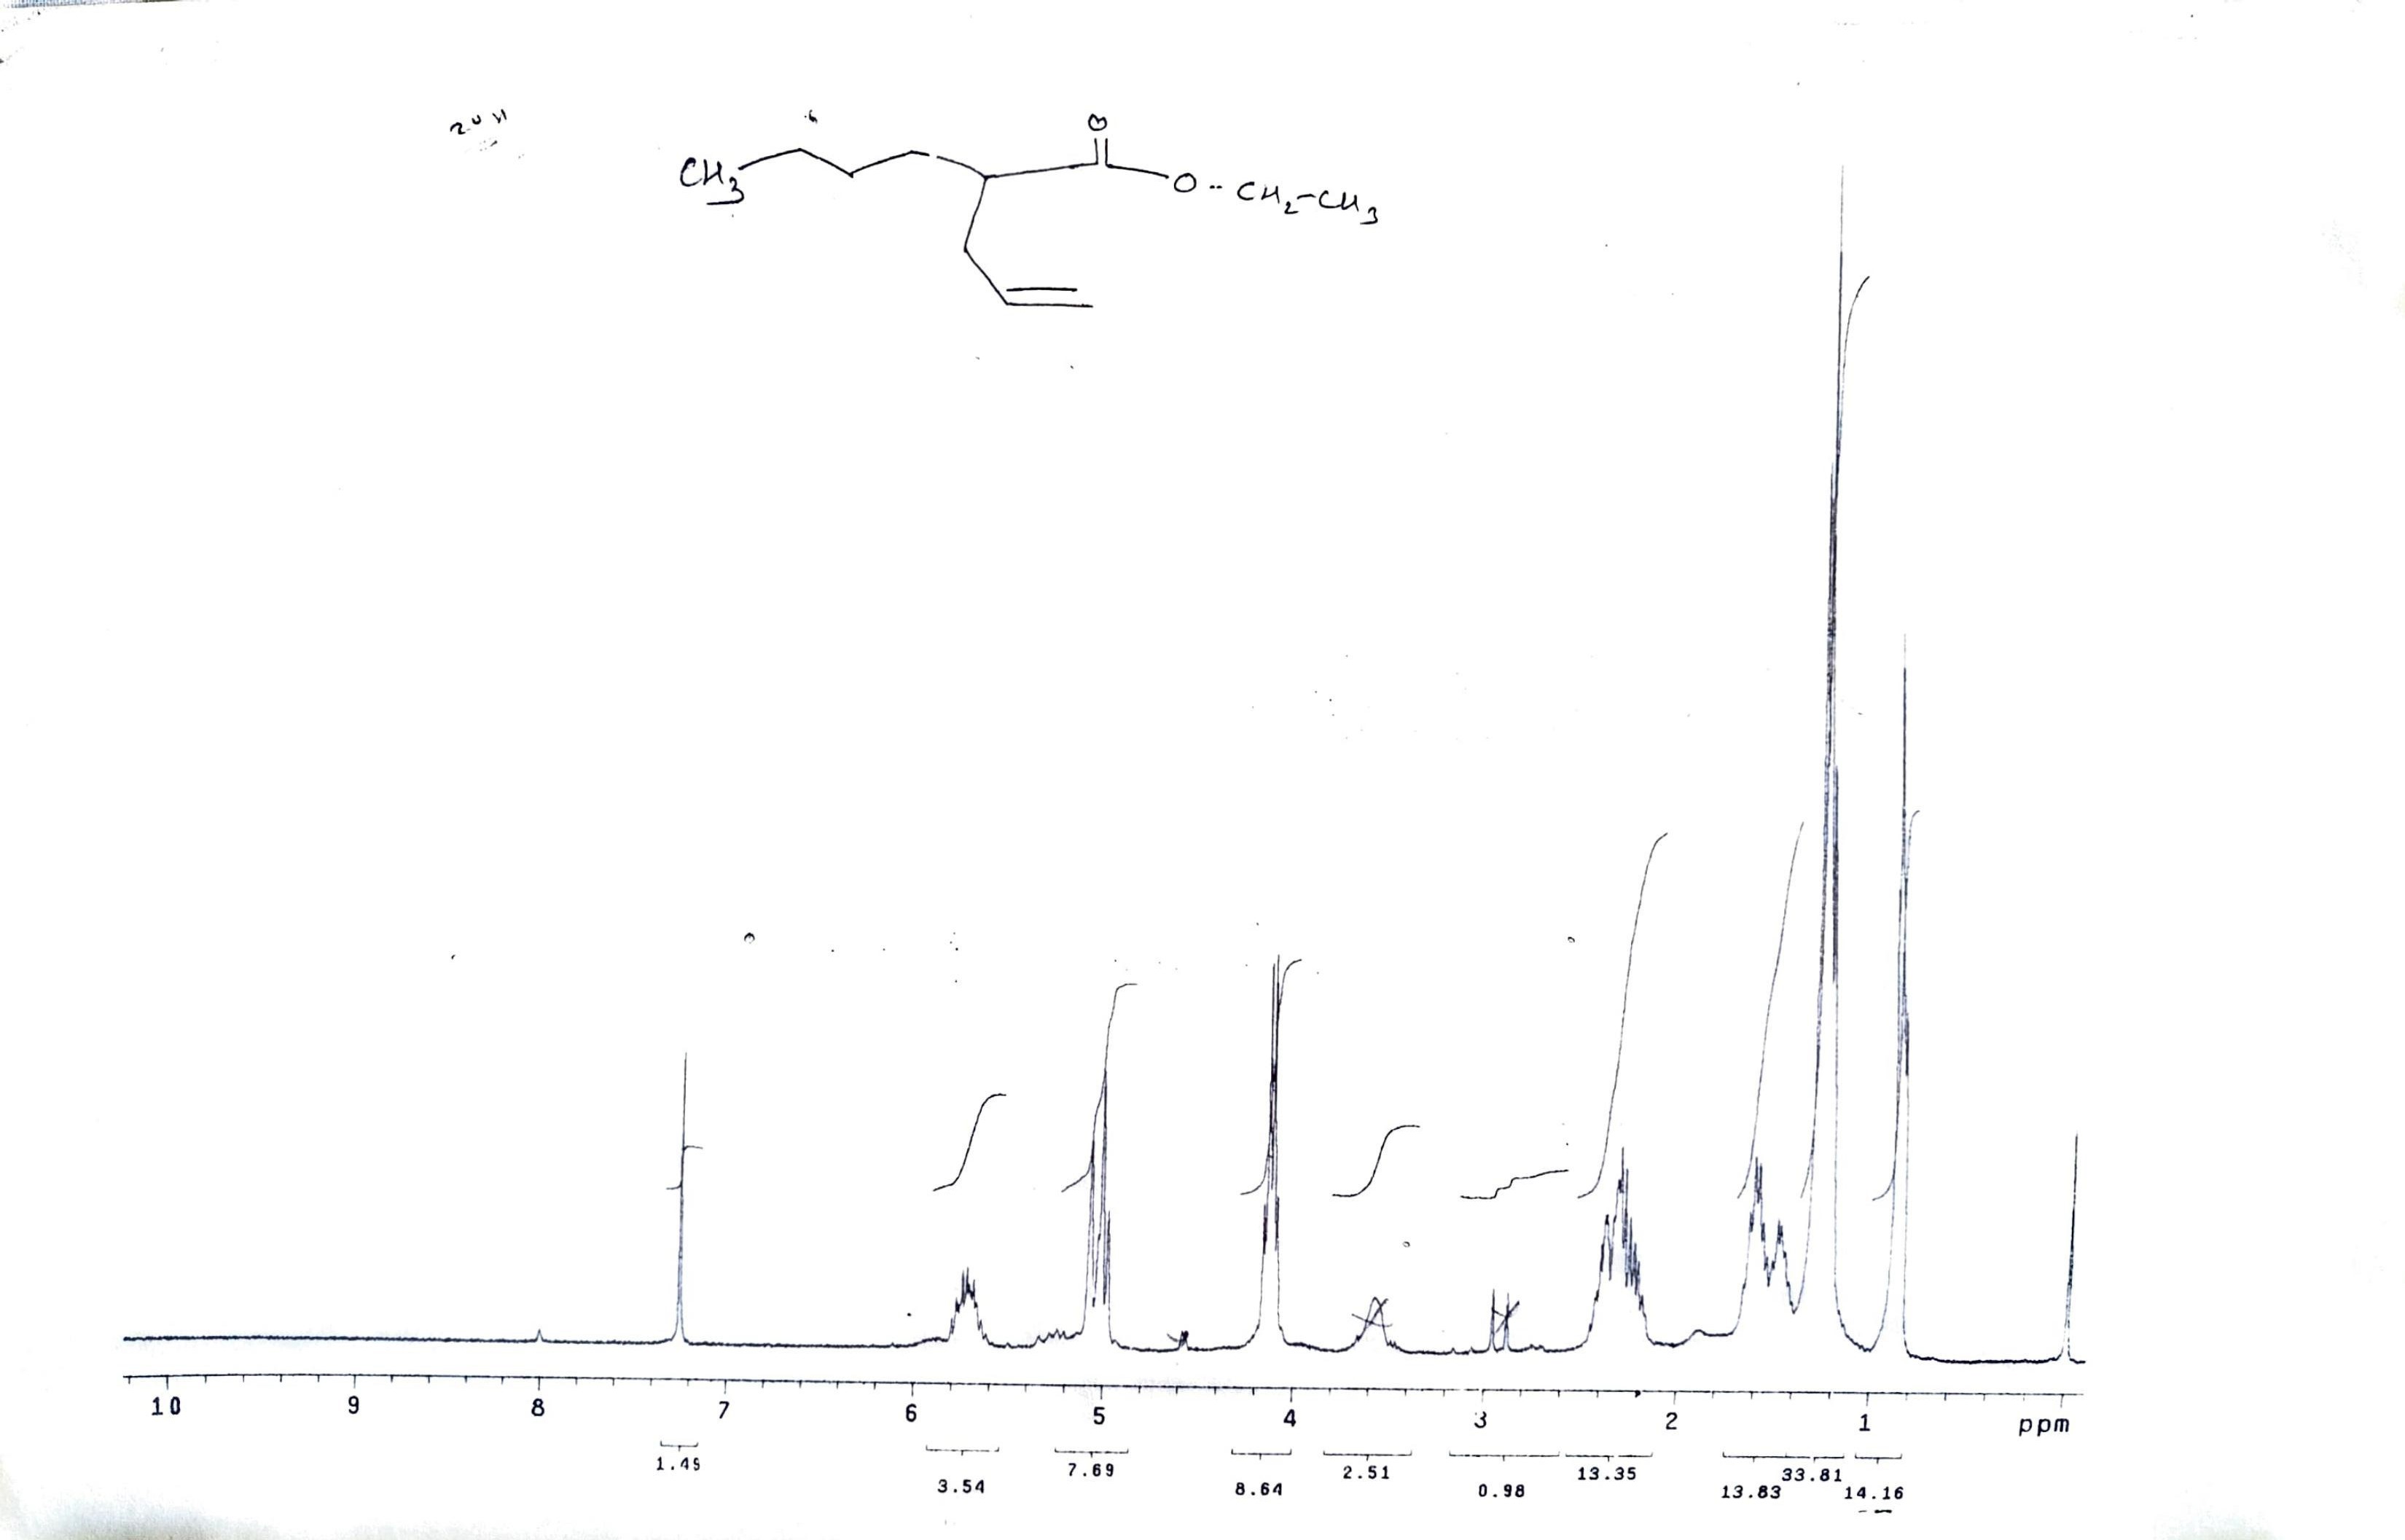


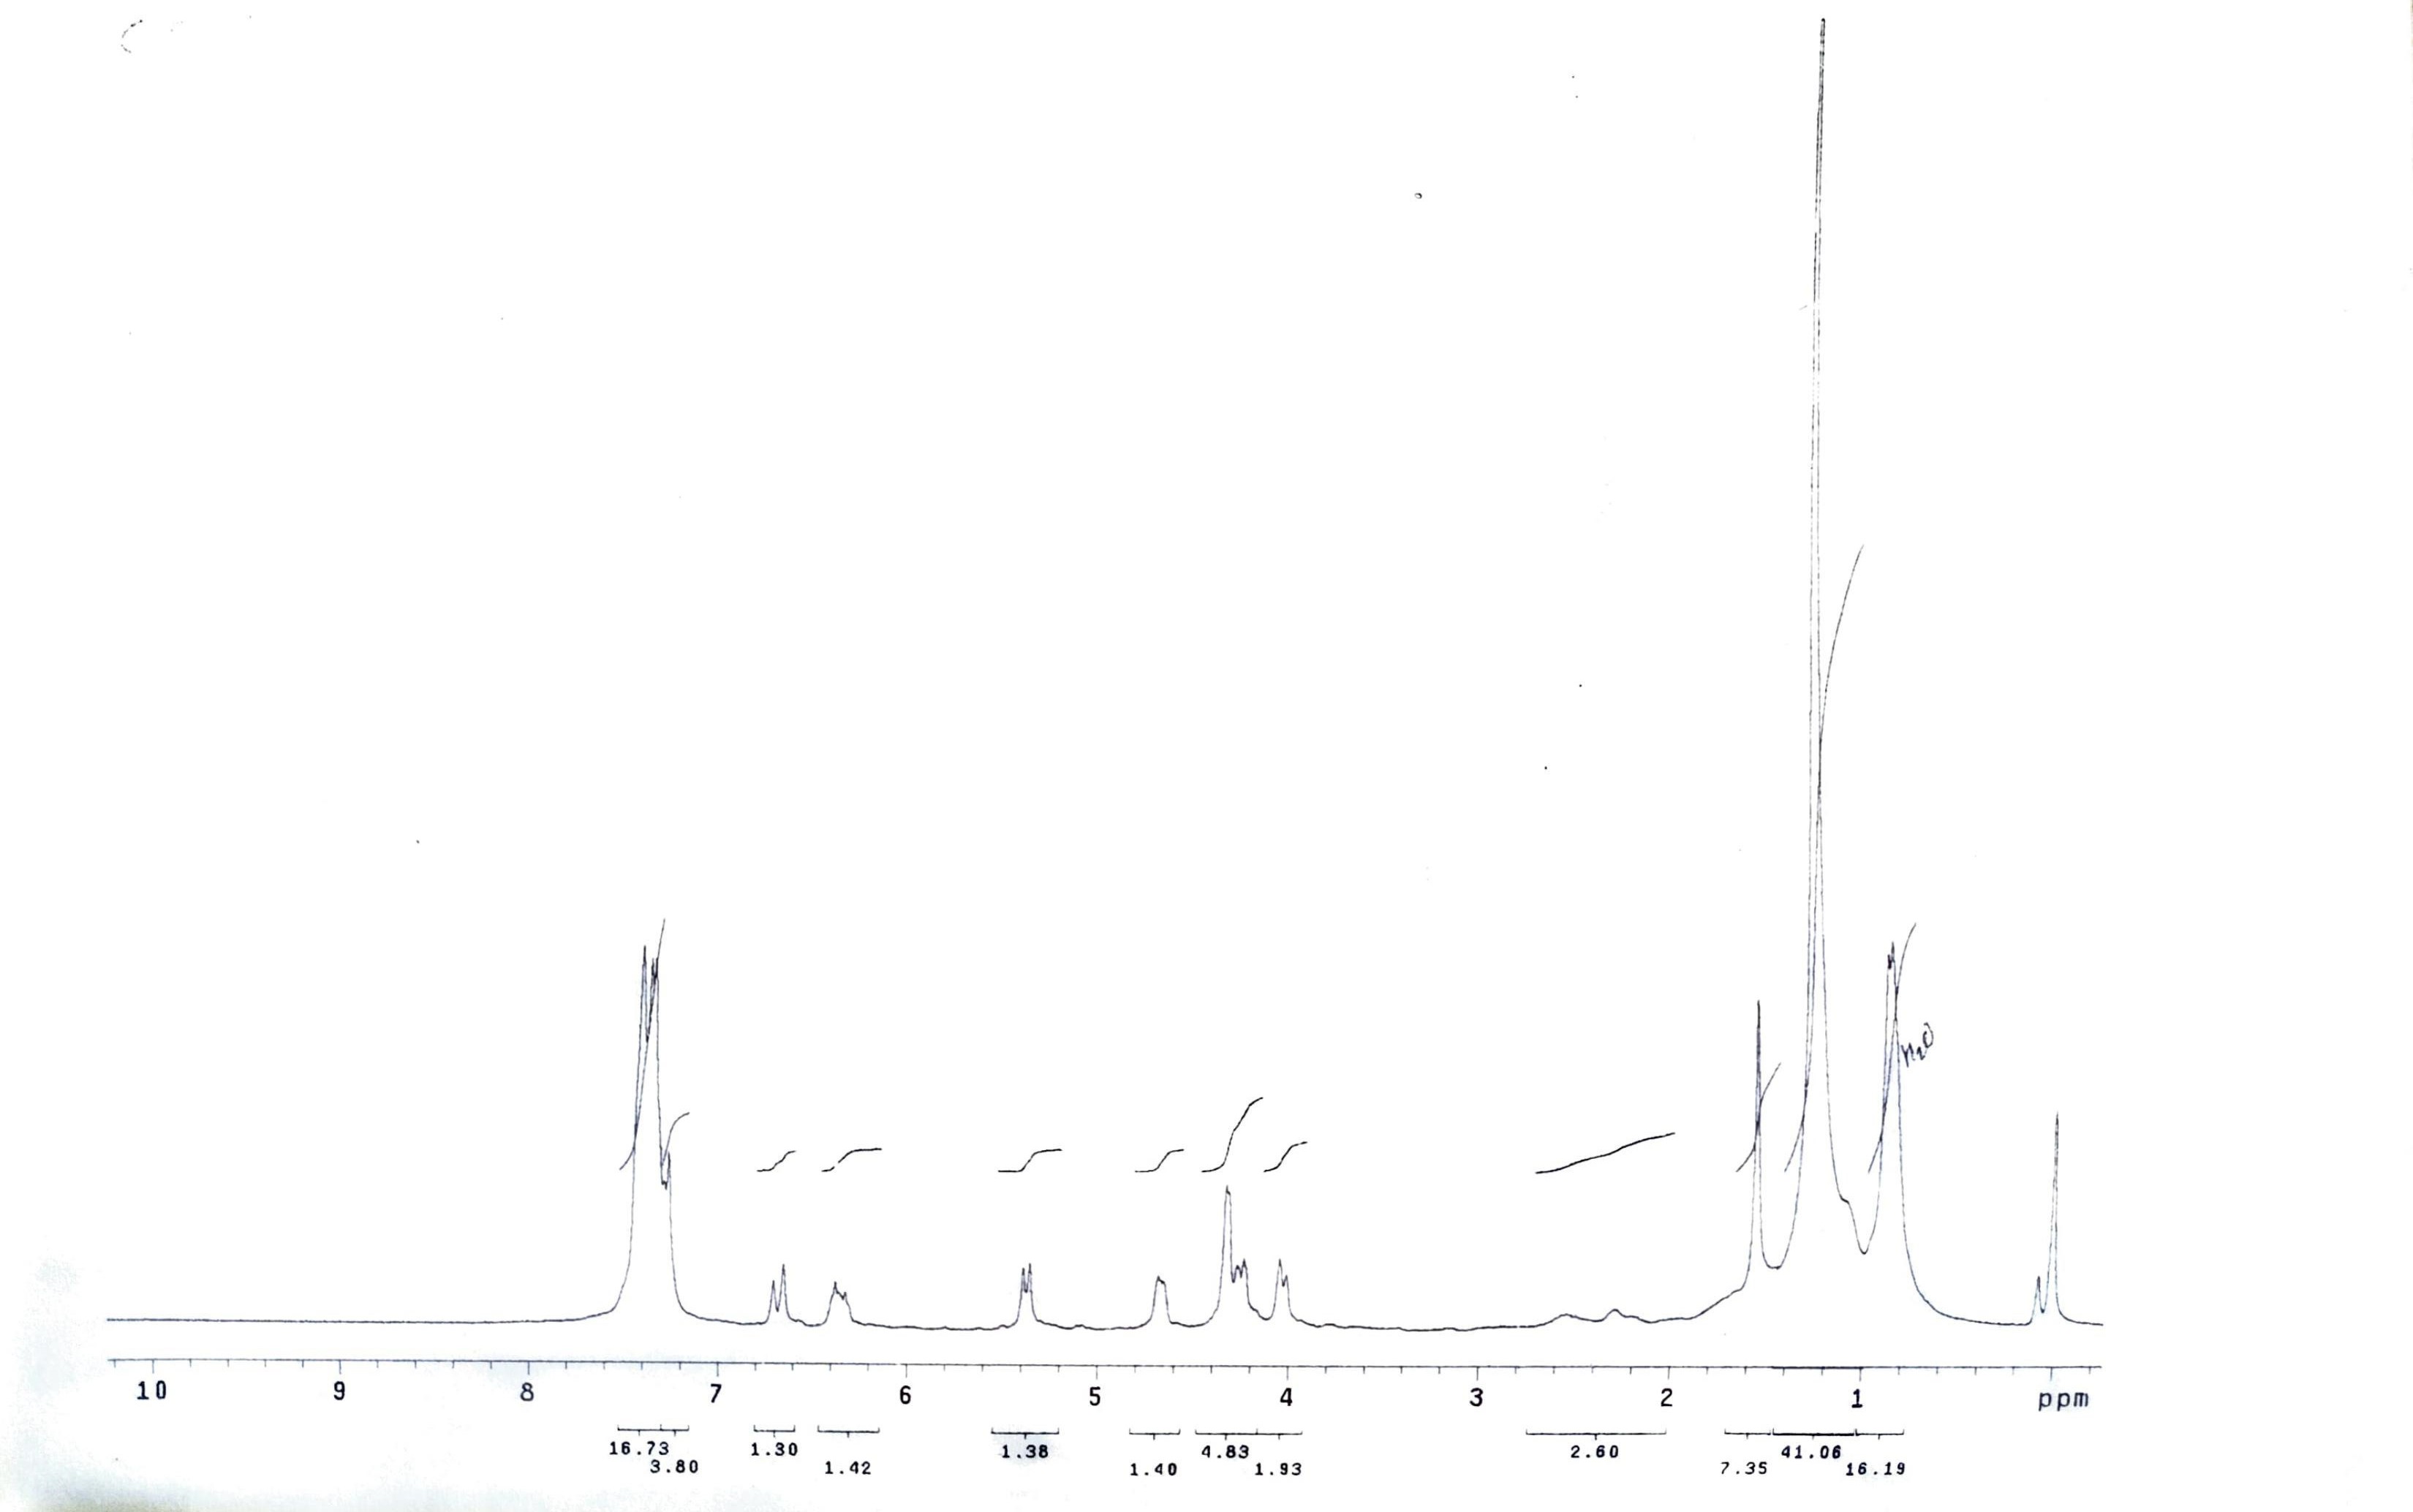


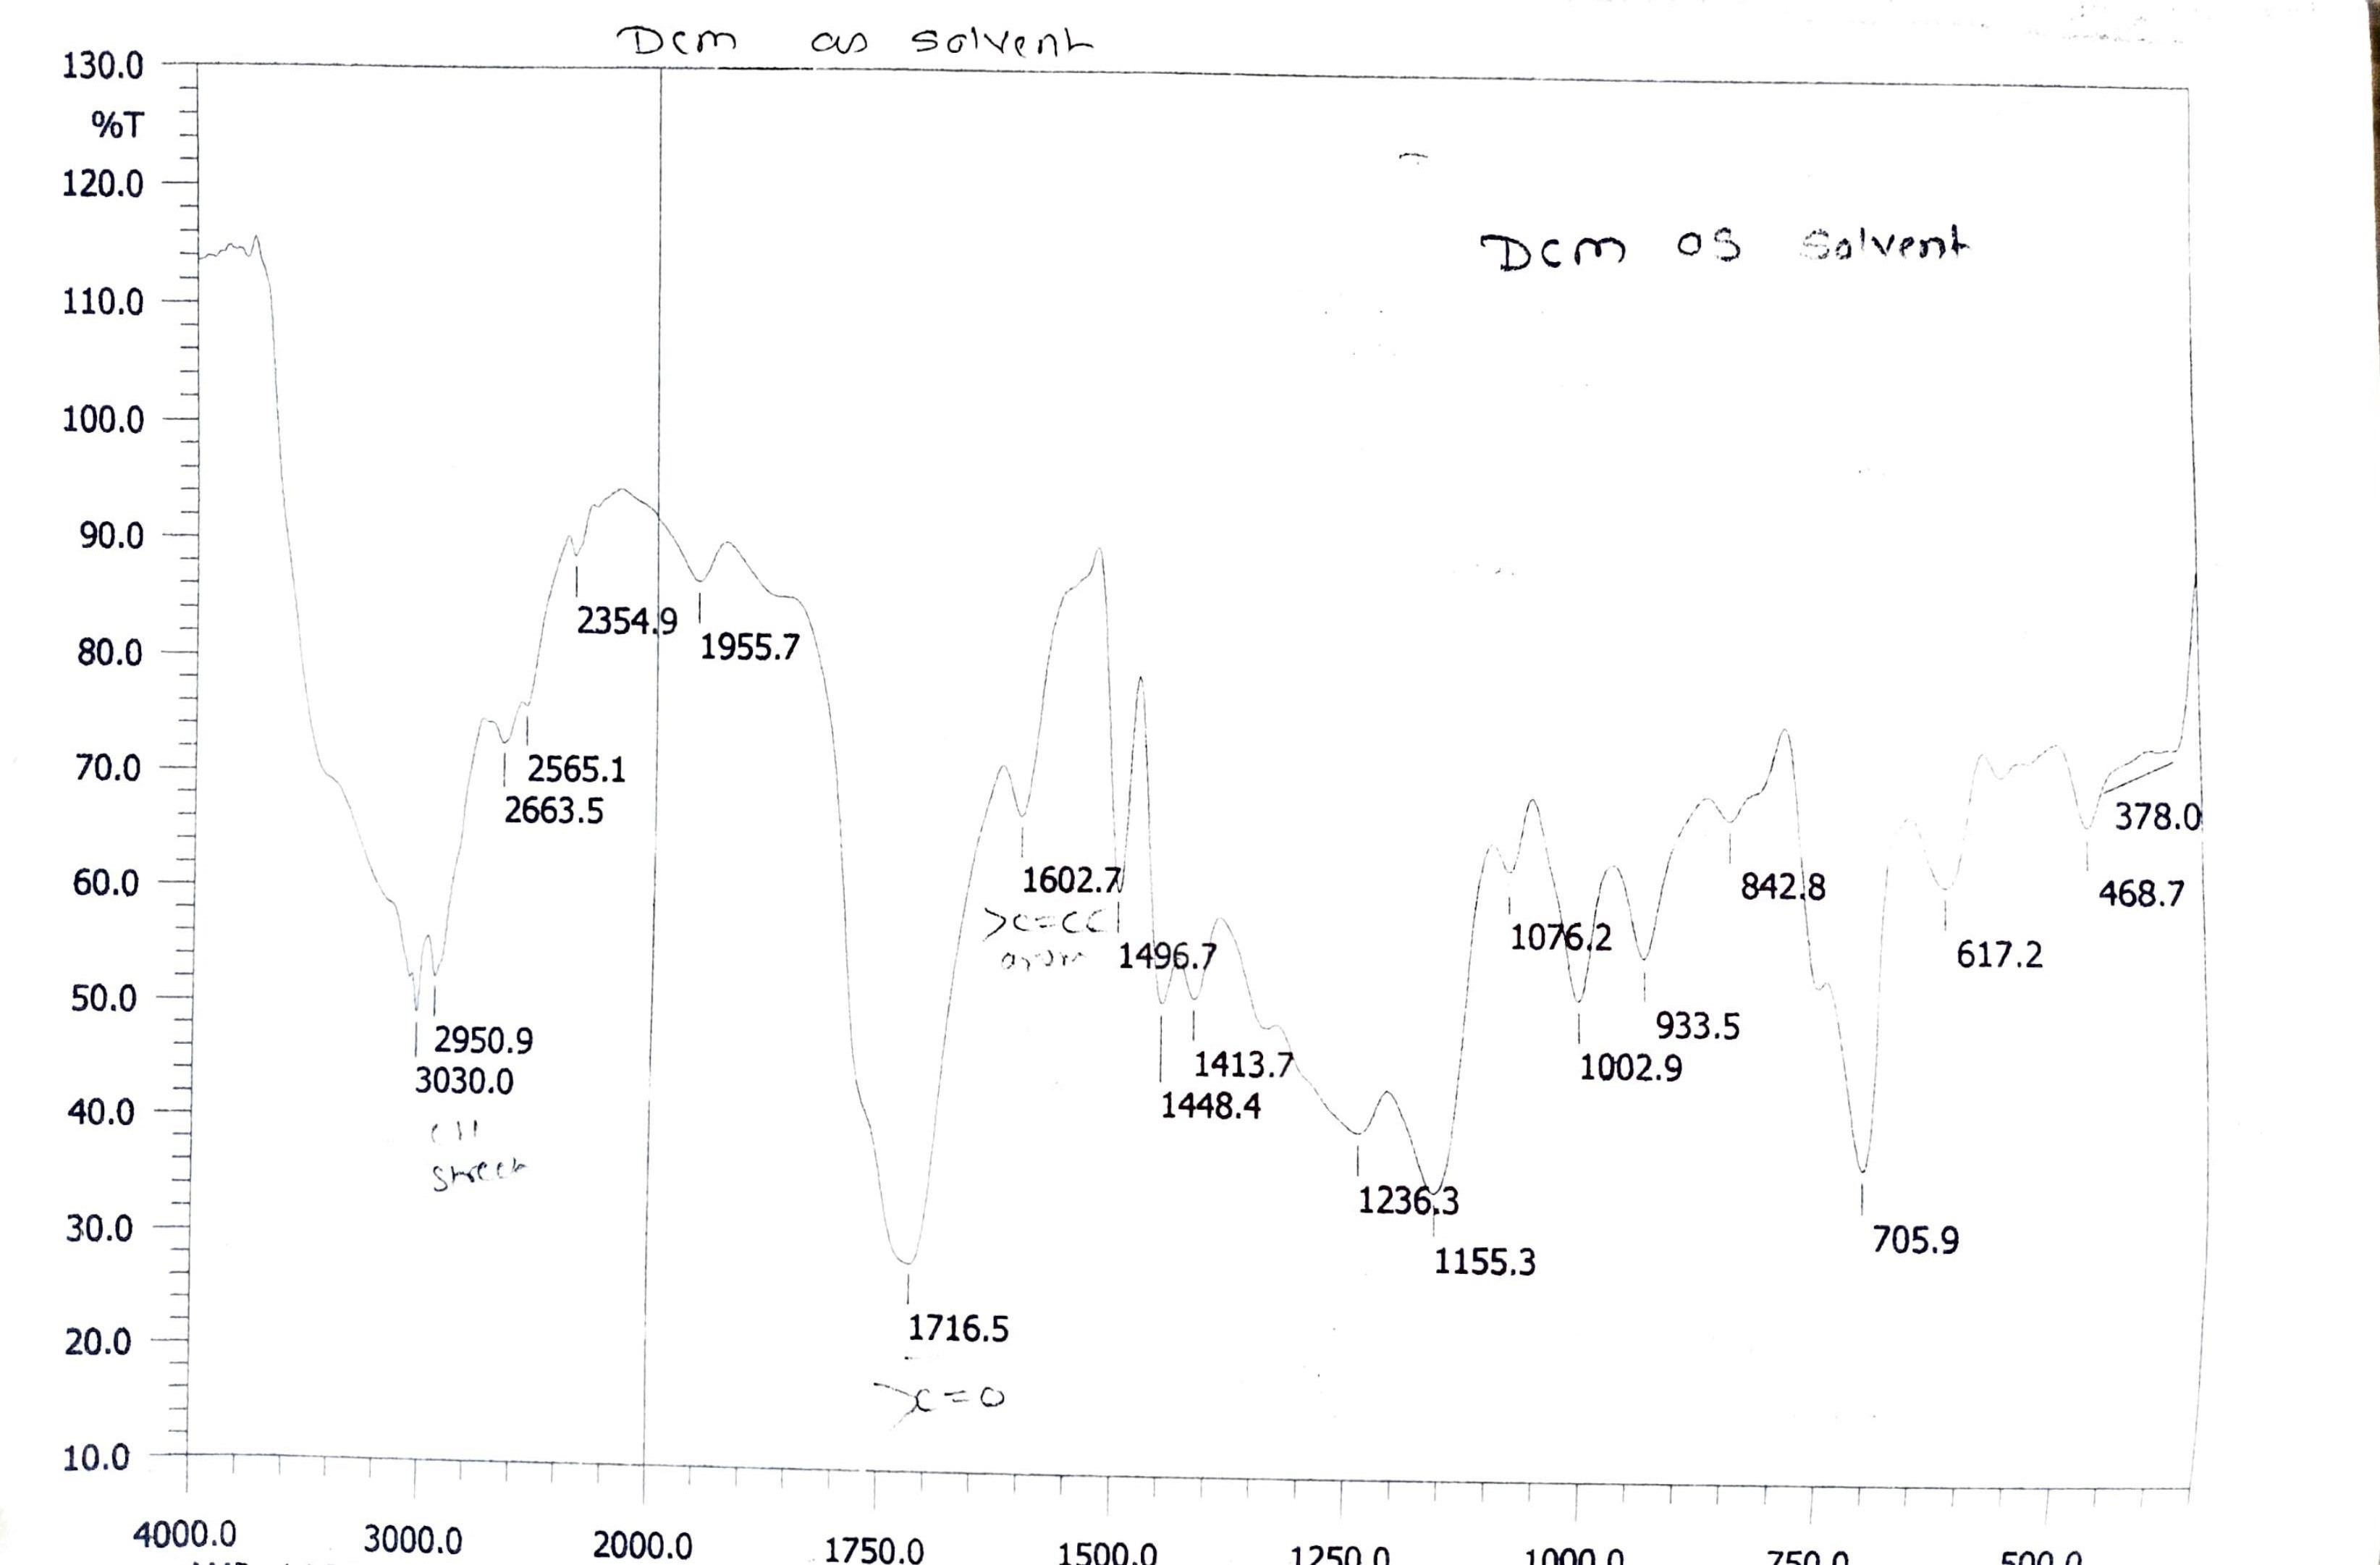


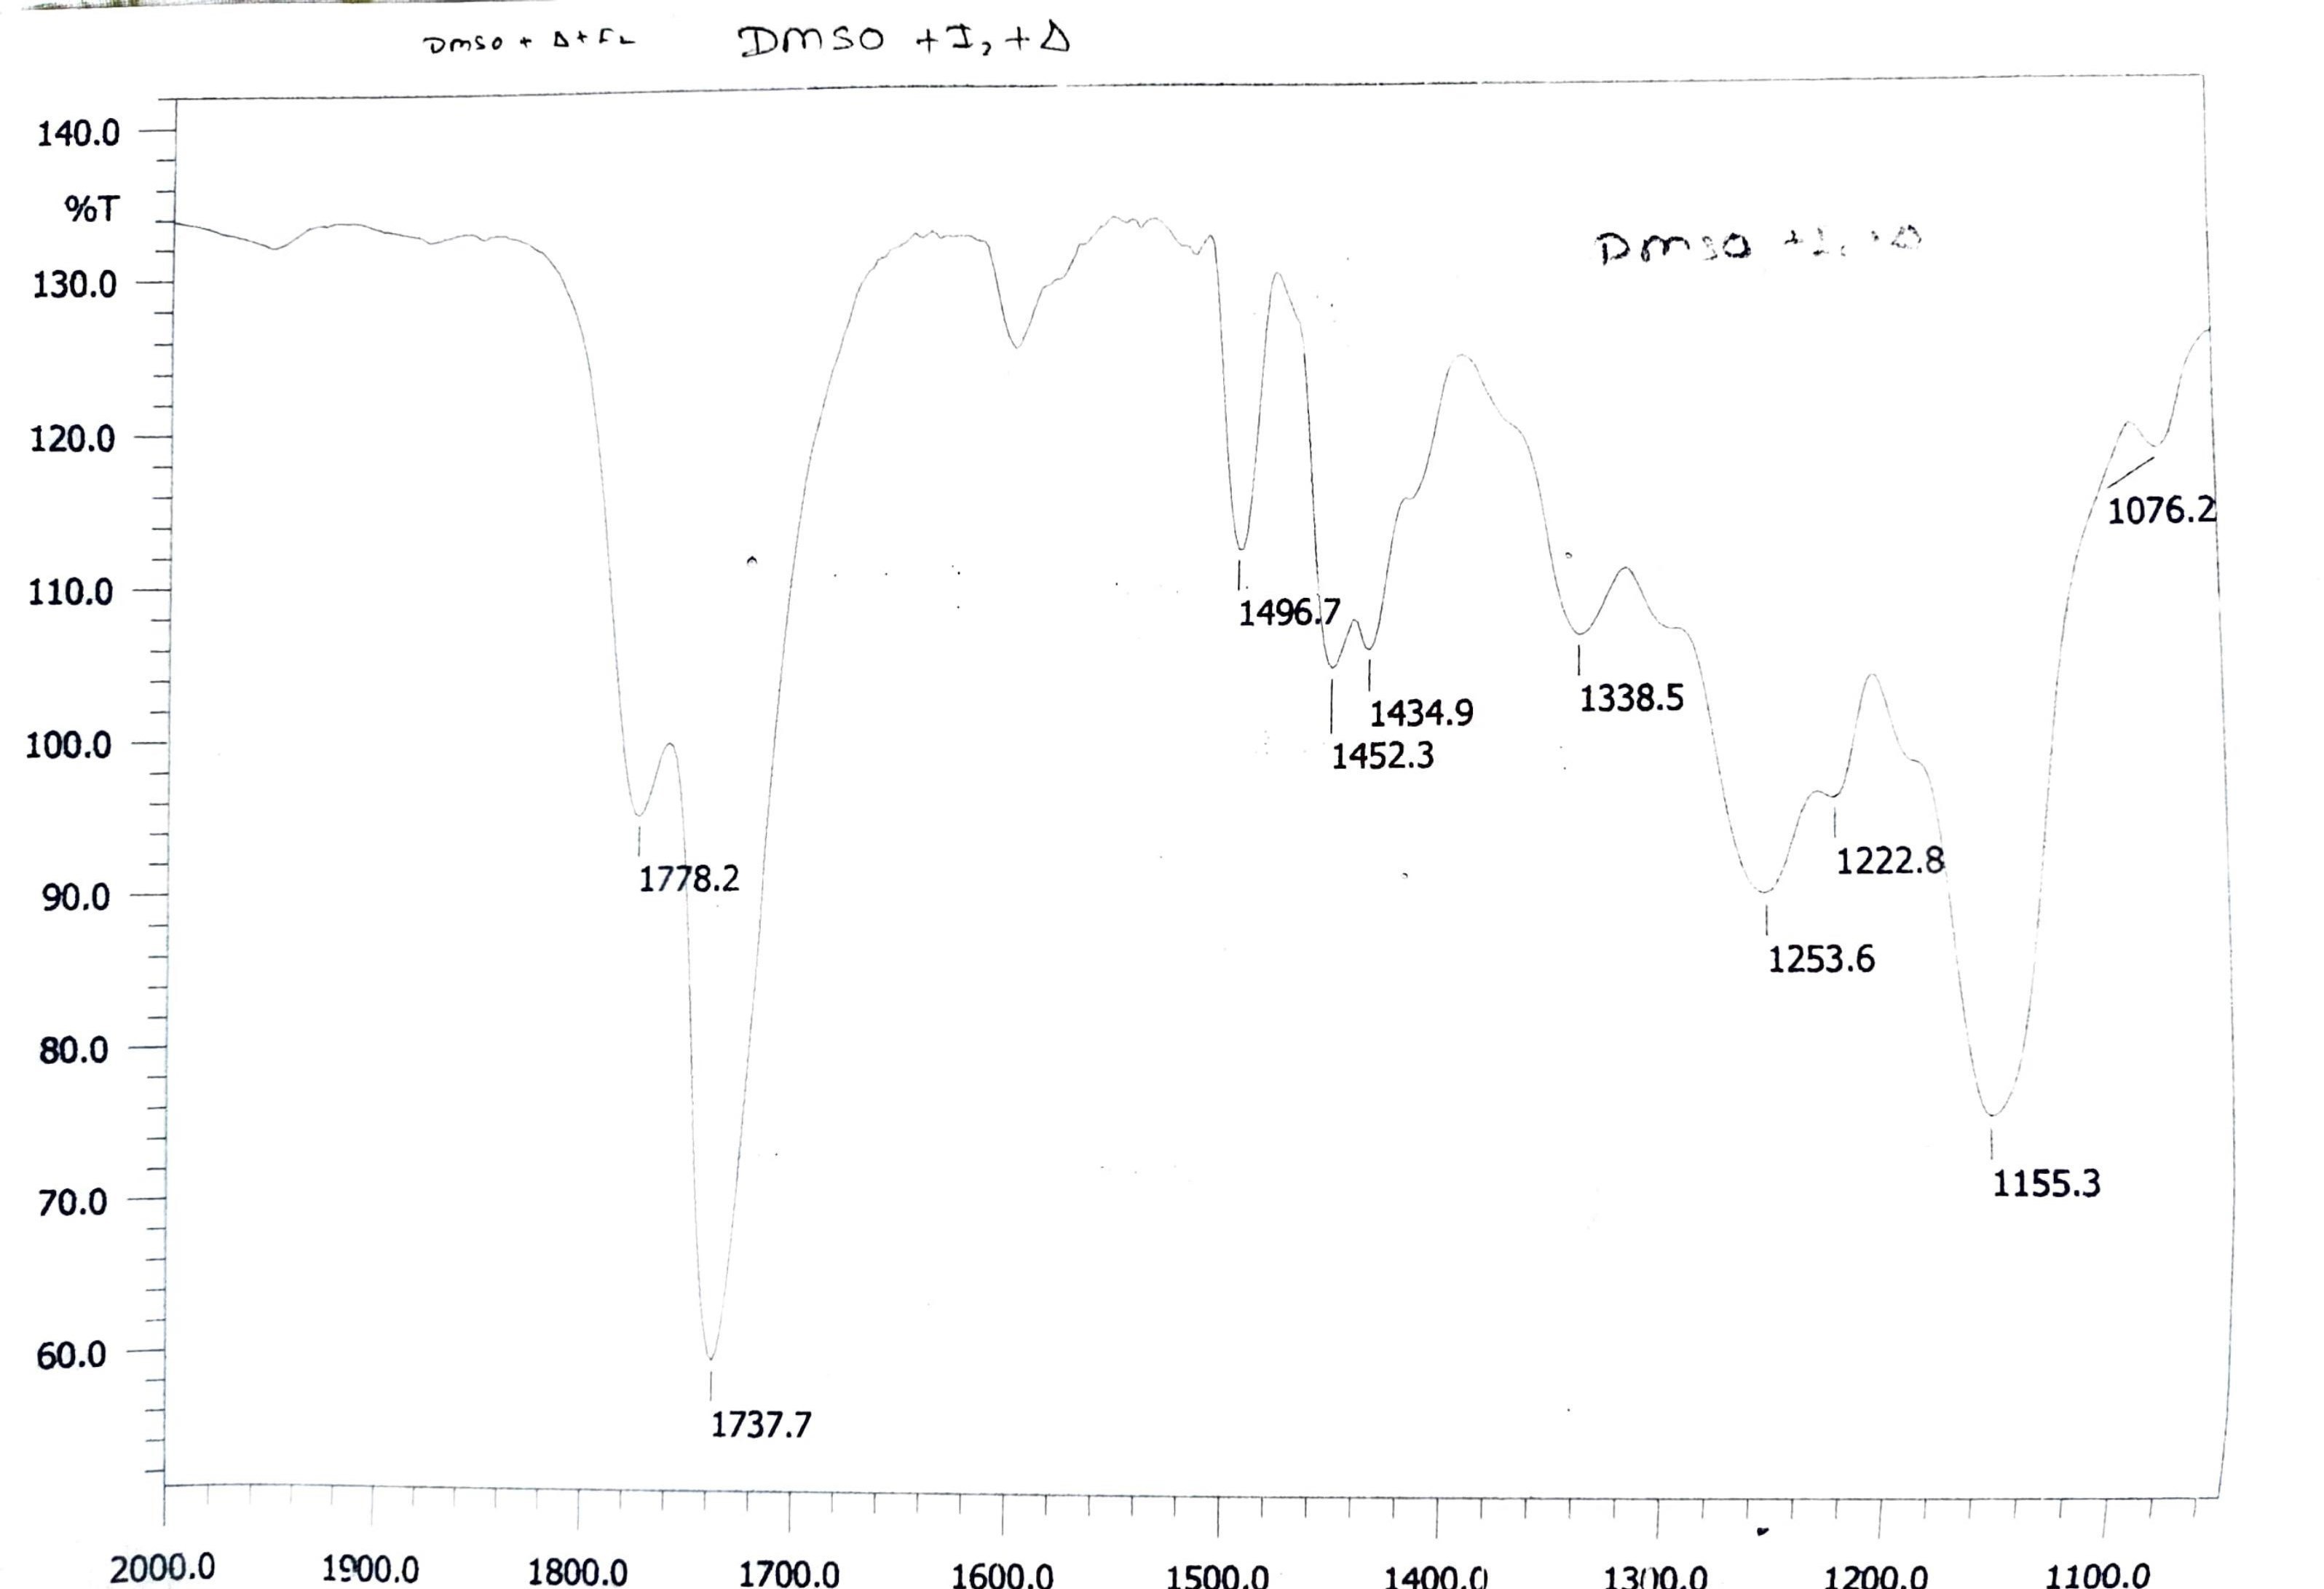


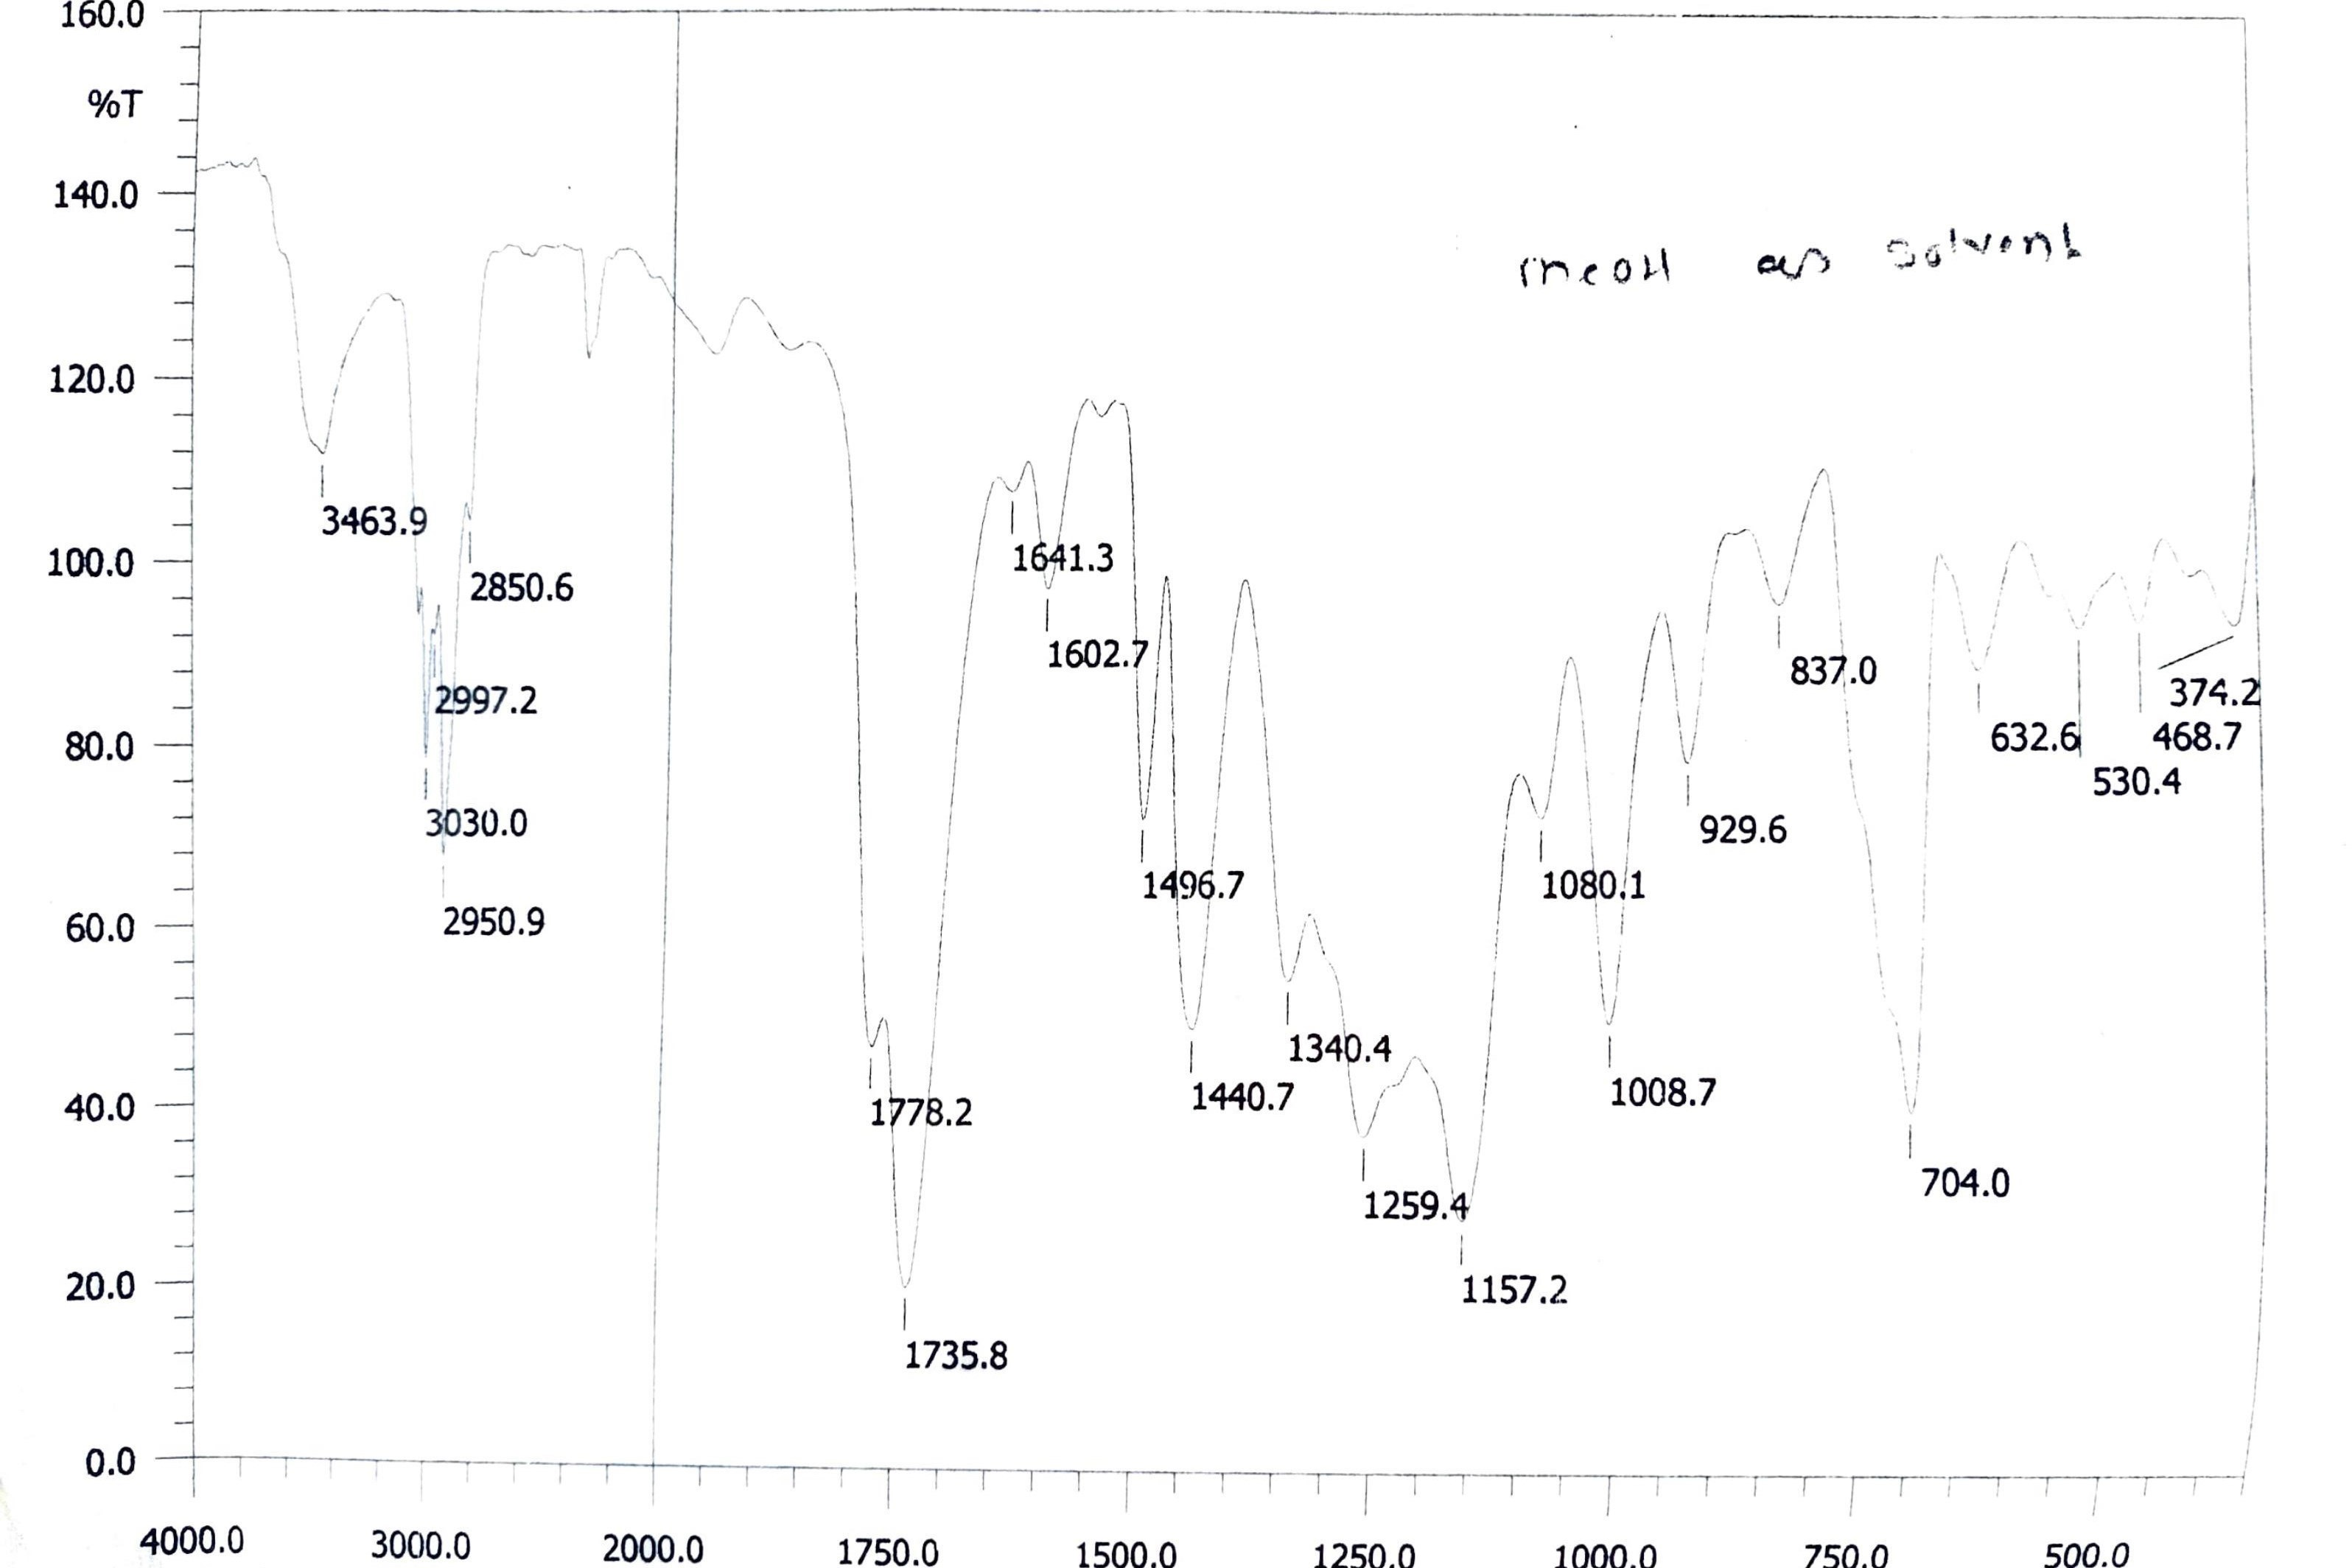


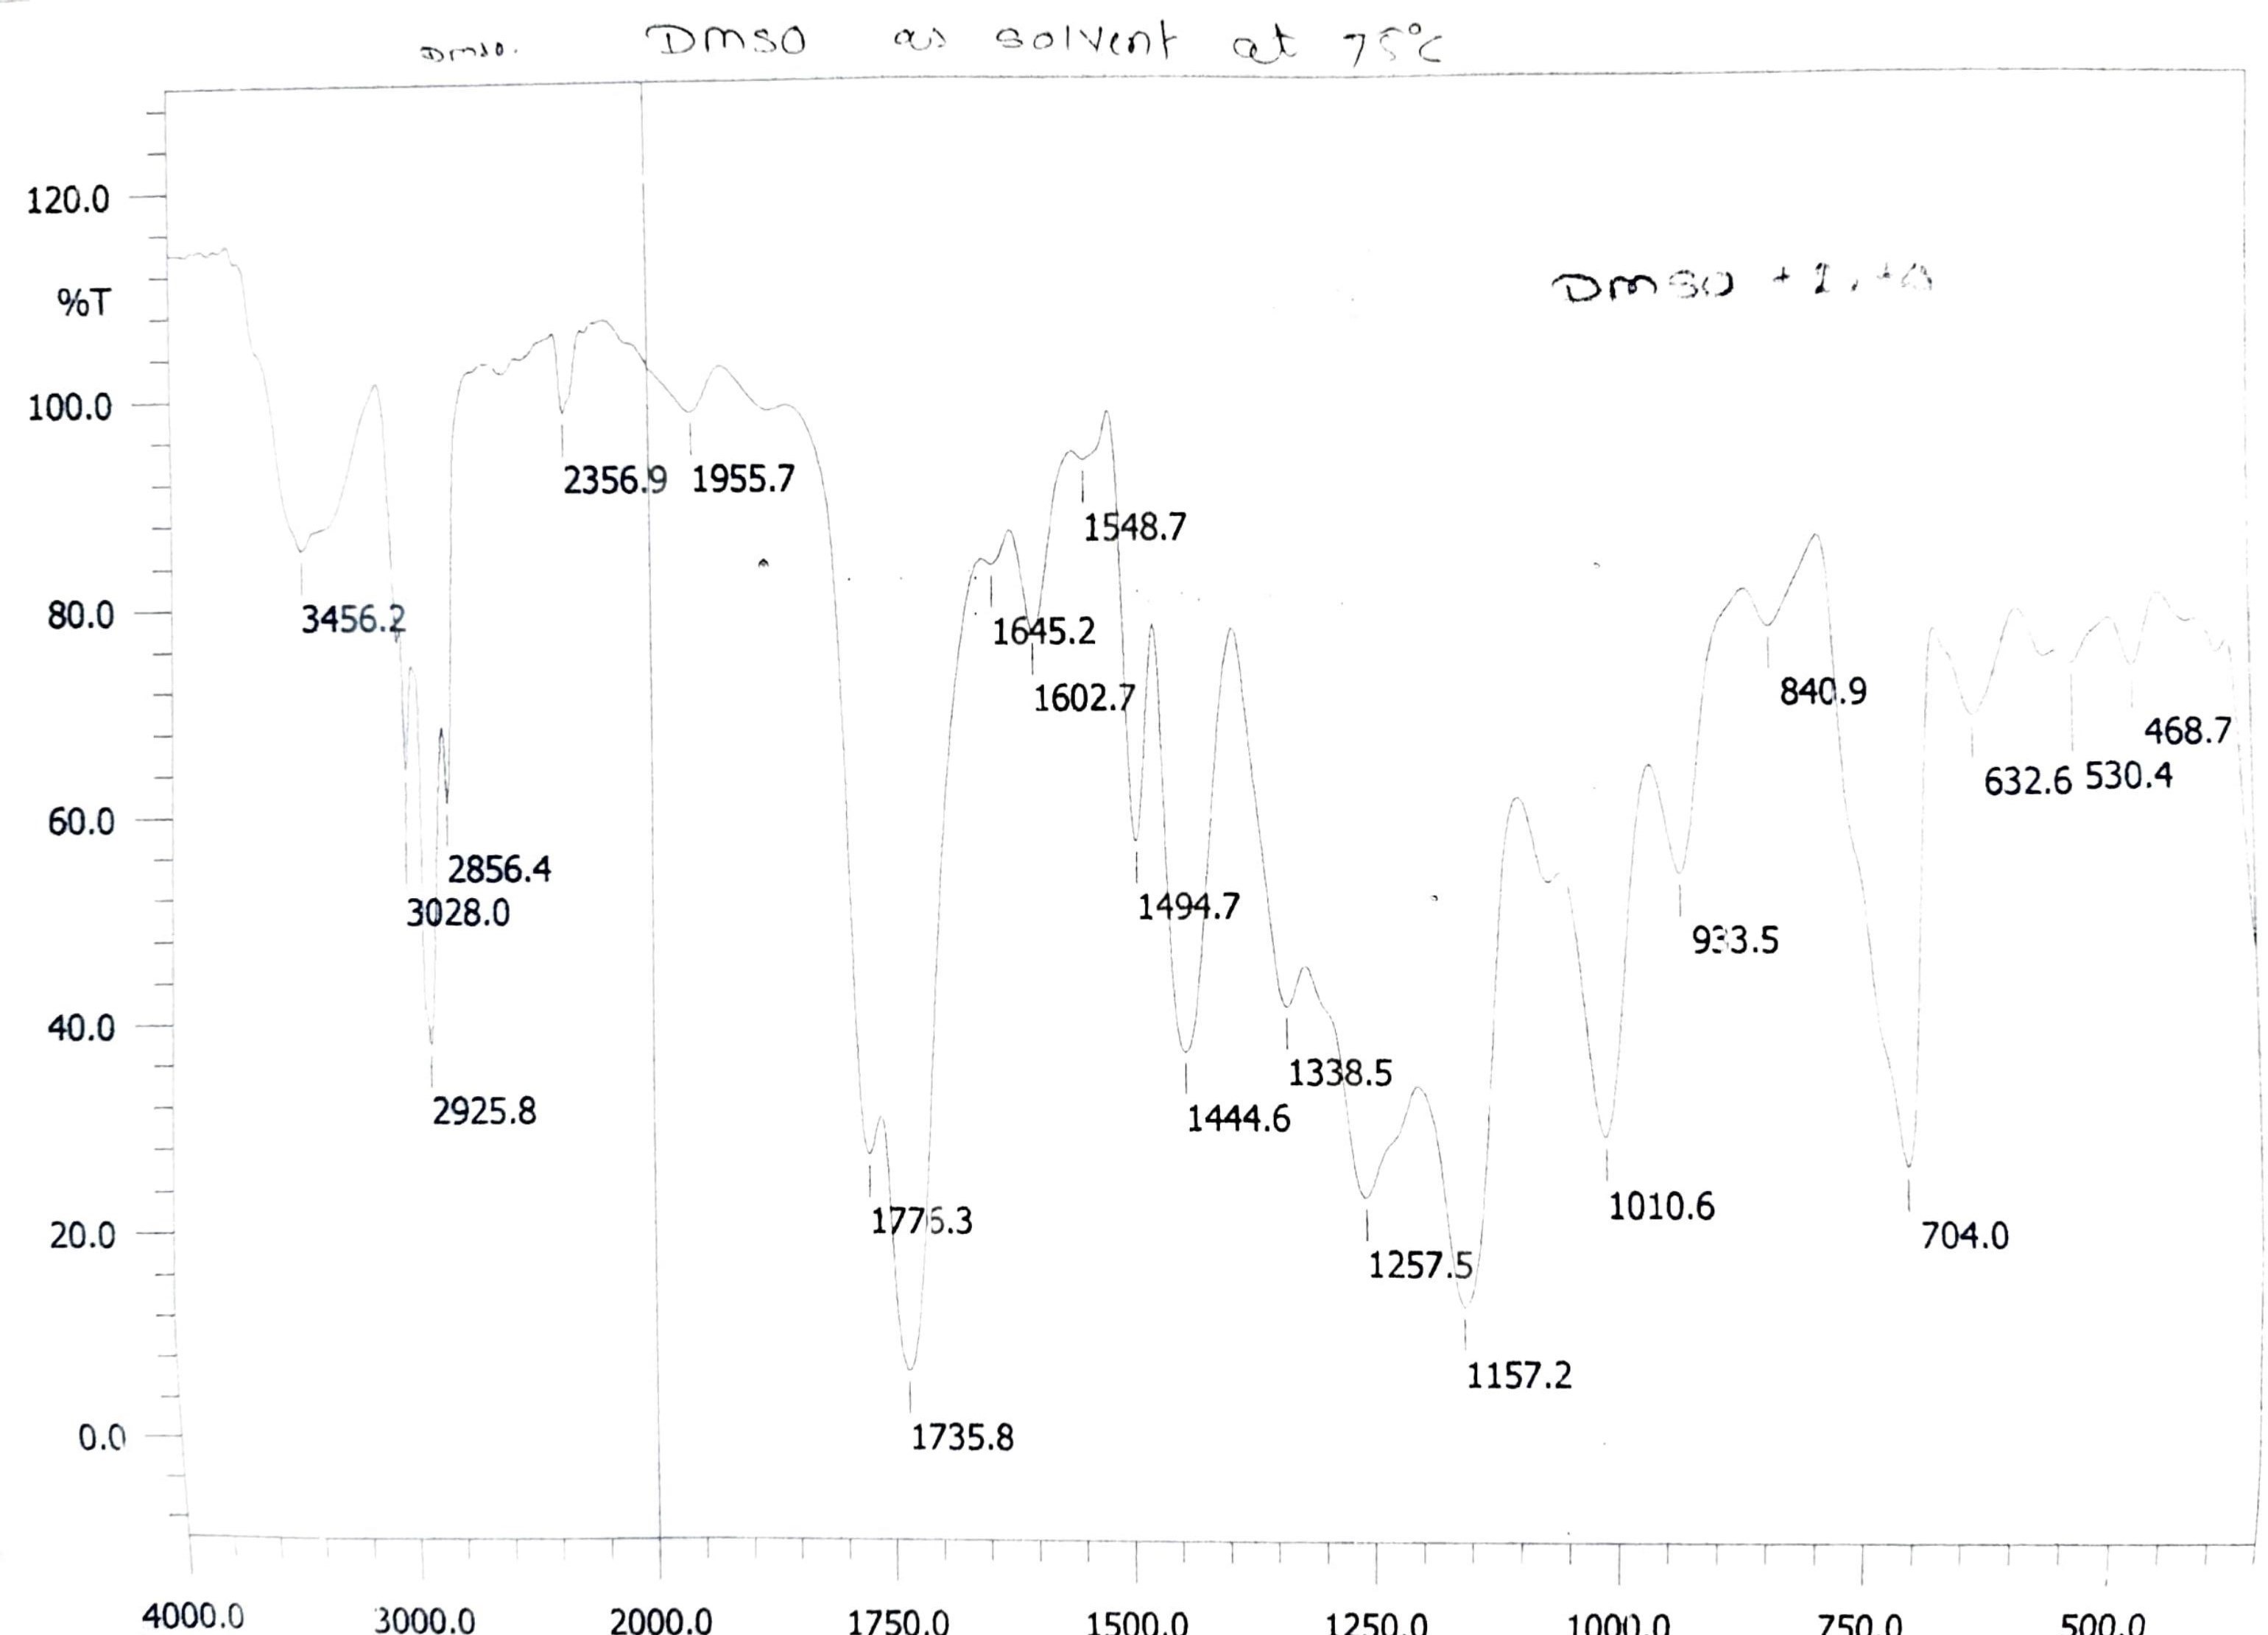


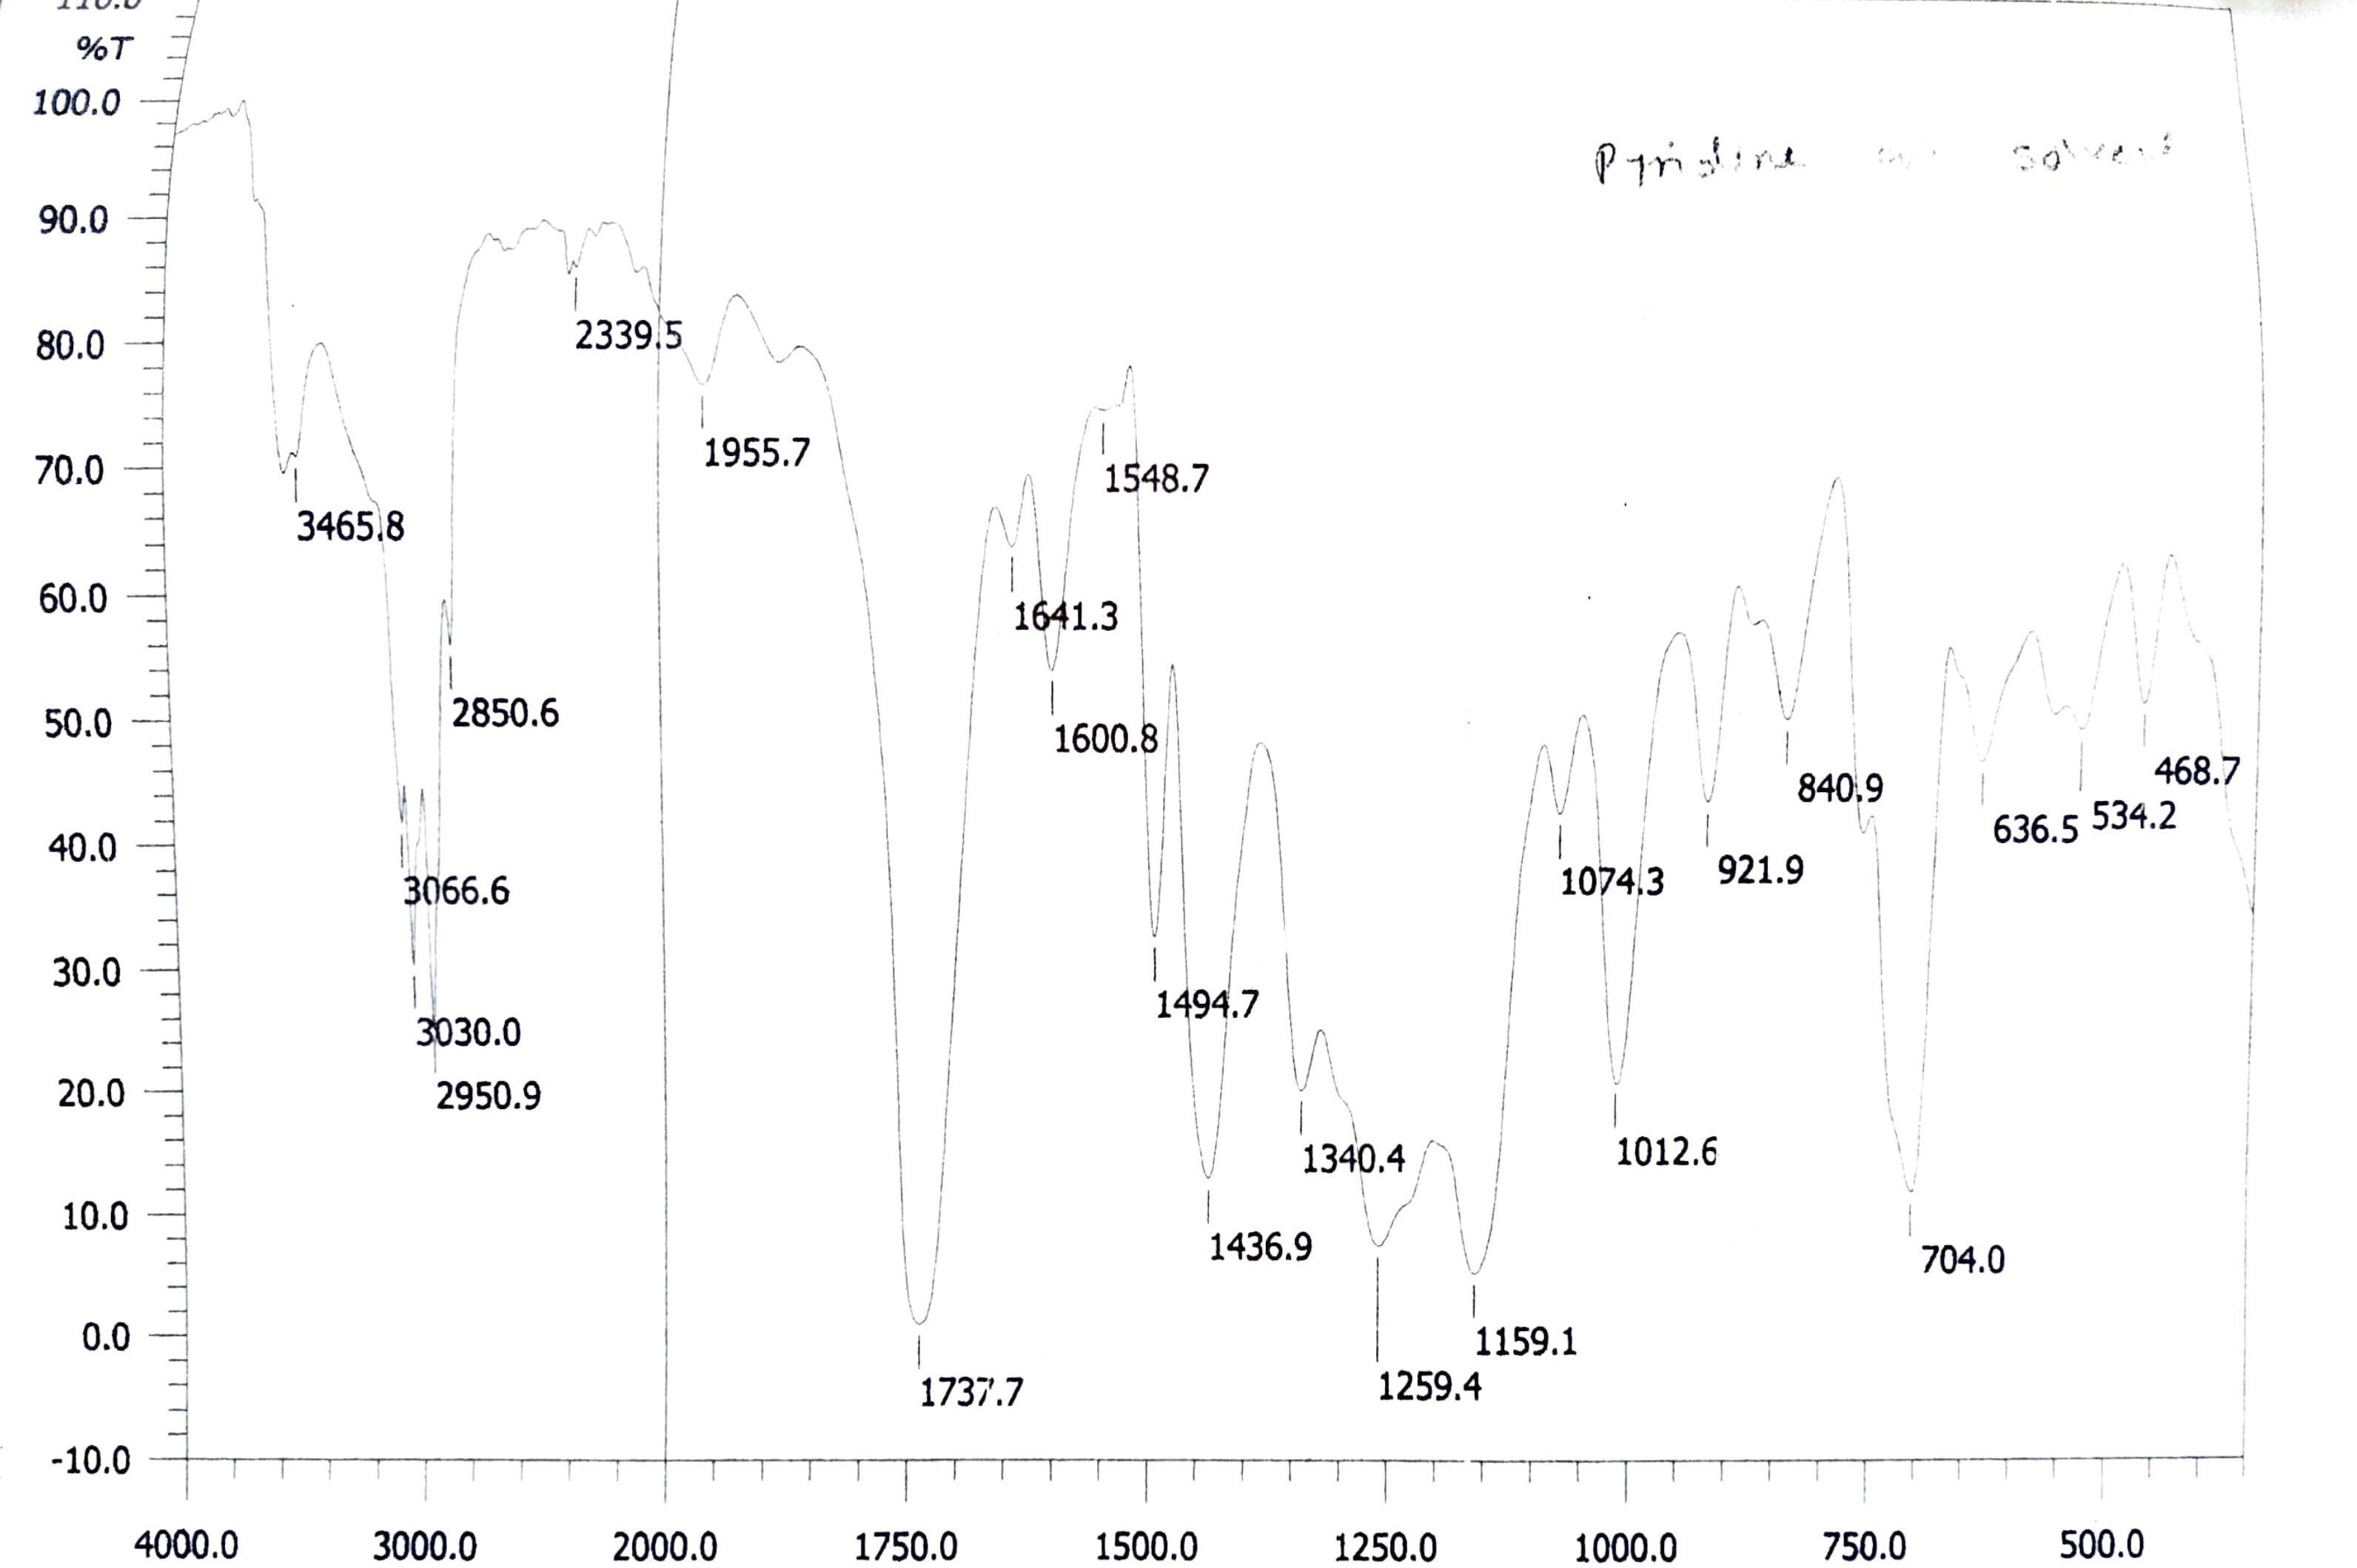


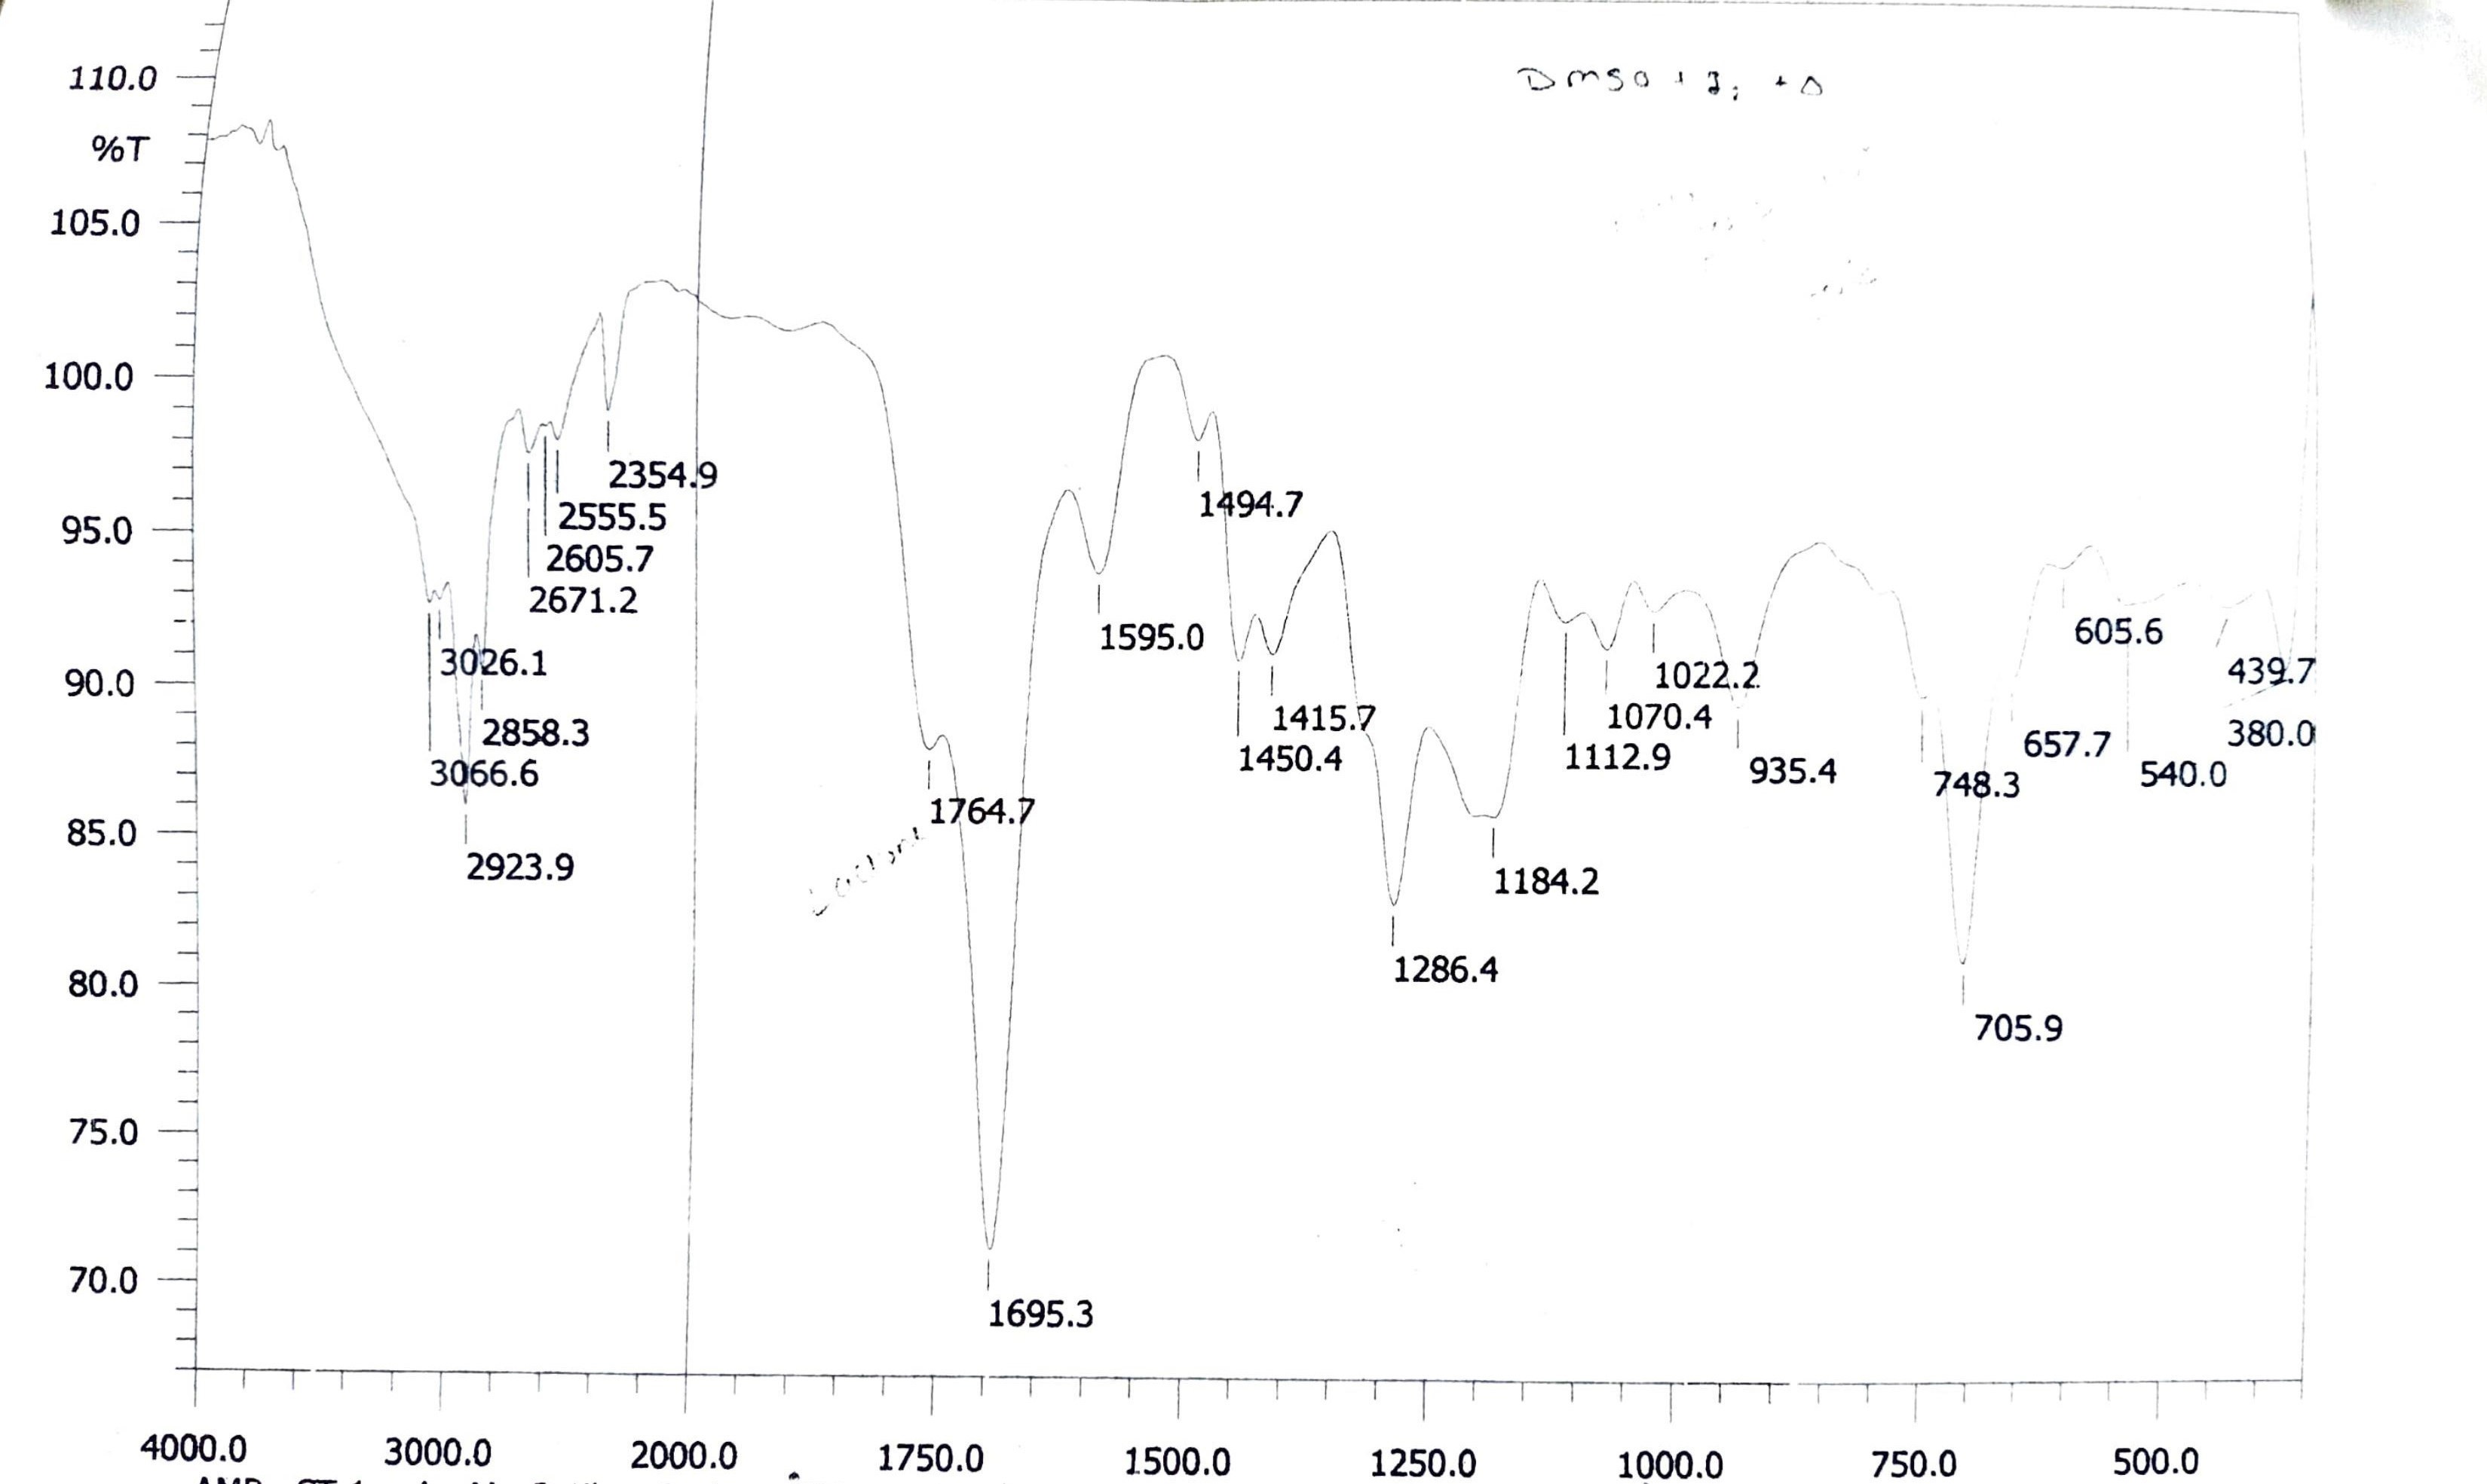


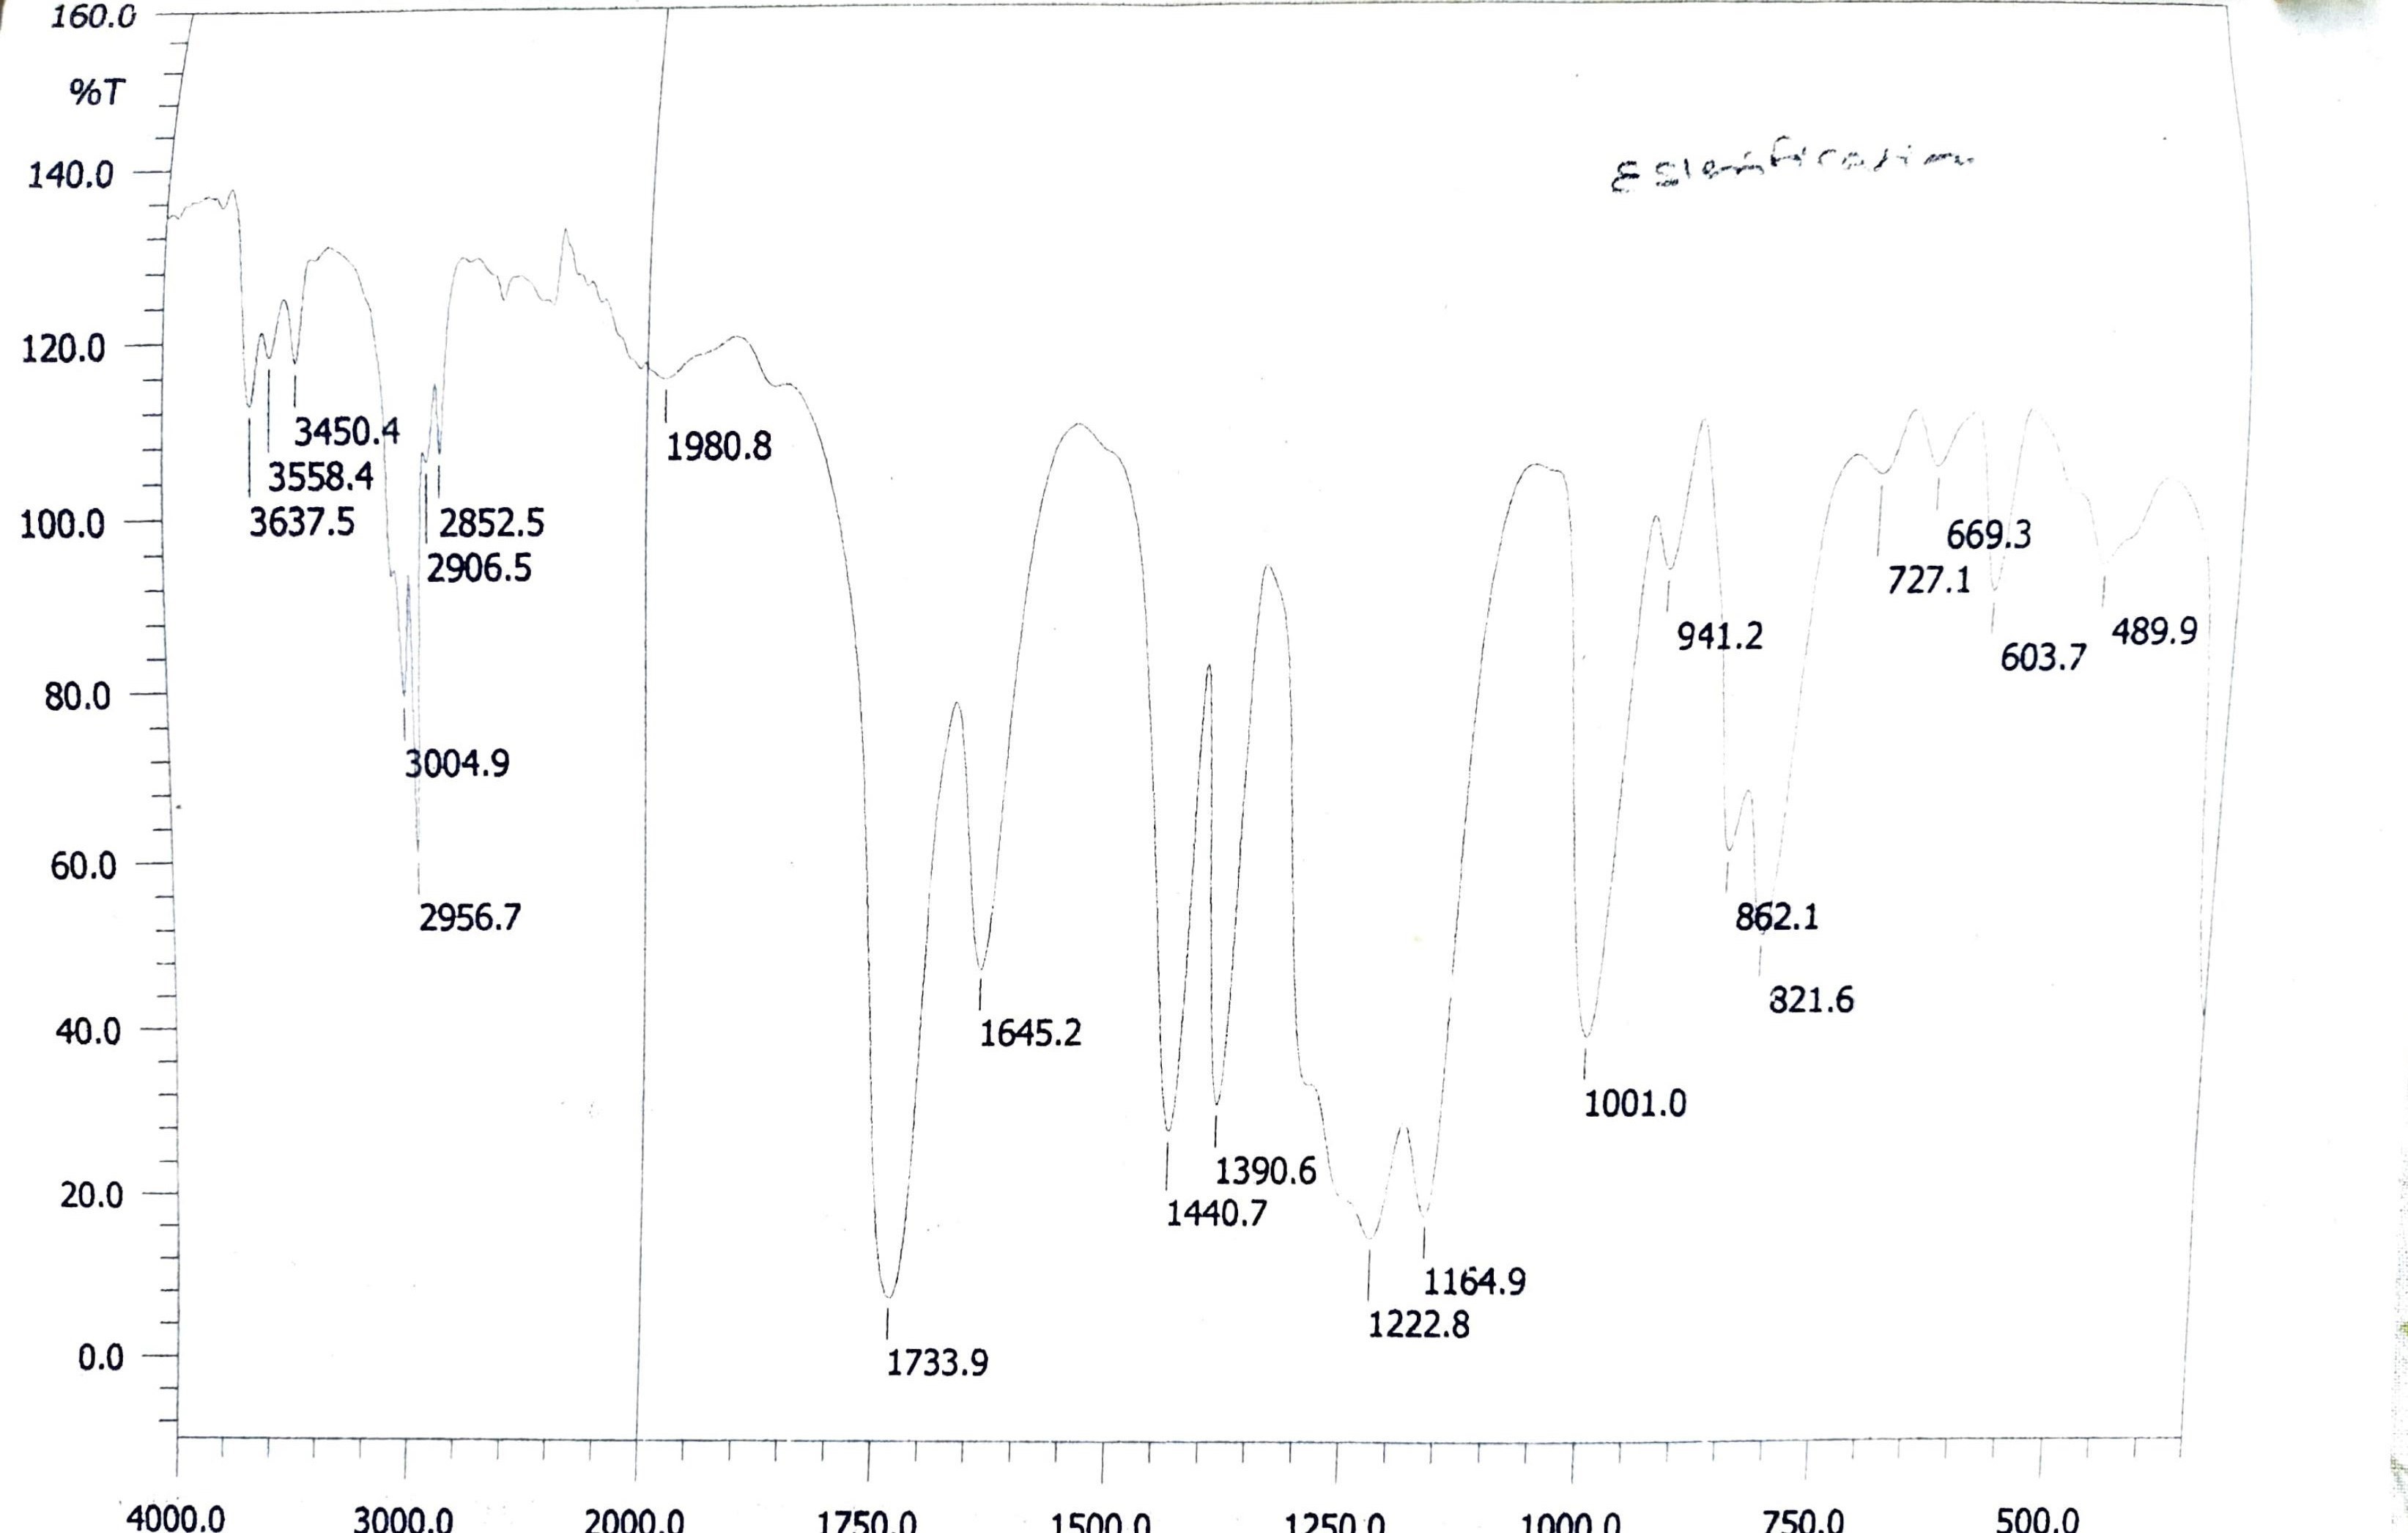

Supplement: Supplementary file 1 [file 67163c9e3ccb1966eed81cb7.docx]
